# Supplementary material
Source: PubMed Central journal article supplement (PMC10292028)
Supplement: NIHMS1899024-supplement-Supporting_Information.pdf [file NIHMS1899024-supplement-Supporting_Information.pdf]

| TABLE OF CONTENTS                                                                                                                                                                                                                                                                                      | PAGE |
|--------------------------------------------------------------------------------------------------------------------------------------------------------------------------------------------------------------------------------------------------------------------------------------------------------|------|
| <b>I-Supporting Experimental Section</b>                                                                                                                                                                                                                                                               | S3   |
| <b>II-Supporting Figures</b>                                                                                                                                                                                                                                                                           | S4   |
| <b>Figure S1.</b> Overall X-ray crystal structure of ligand-bound PriB (PDB ID 5INJ)                                                                                                                                                                                                                   | S4   |
| <b>Figure S2.</b> Close up view of the PriB active site                                                                                                                                                                                                                                                | S5   |
| <b>Figure S3.</b> Structural-based alignment of PriB (PDB ID 5INJ, C6) with other IPTs                                                                                                                                                                                                                 | S6   |
| <b>Figure S4.</b> Close-up view of the active site of the ligand-bound X-ray crystal structures of indole prenyltransferases showing residues that align with PriB His312                                                                                                                              | S7   |
| <b>Figure S5.</b> SDS-PAGE of PriB wild-type and mutant enzymes                                                                                                                                                                                                                                        | S8   |
| <b>Figure S6.</b> Circular dichroism spectra of PriB wild-type and mutant enzymes                                                                                                                                                                                                                      | S9   |
| <b>Figure S7.</b> HPLC traces of wild-type and mutant PriB enzymatic reactions                                                                                                                                                                                                                         | S10  |
| <b>Figure S8.</b> Steady state kinetics of recombinant wild-type and selected PriB mutants; (A) wild-type PriB, (B) PriB_H312E, (C) PriB_H312G, (D) PriB_H312K, (E) PriB_H312Q, (F) PriB_H312Y, (G) PriB_Y364H                                                                                         | S12  |
| <b>Figure S9.</b> $^1\text{H}$ - $^1\text{H}$ COSY, $^1\text{H}$ - $^{13}\text{C}$ HMBC and $^1\text{H}$ - $^1\text{H}$ NOSEY correlations of (2 <i>S</i> )-3a-(3-methylbut-2-en-1-yl)-1,2,3,3a,8,8a-hexahydropyrrolo[2,3- <i>b</i> ]indole-2-carboxylic acid ( <i>d</i> <sub>6</sub> -DMSO) <b>3b</b> | S13  |
| <b>Figure S10.</b> $^1\text{H}$ - $^1\text{H}$ COSY and $^1\text{H}$ - $^{13}\text{C}$ HMBC correlations of ( <i>S</i> )-2-amino-3-(7-(3-methylbut-2-en-1-yl)-1 <i>H</i> -indol-3-yl)propanoic acid ( <i>d</i> <sub>6</sub> -DMSO) <b>3c</b>                                                           | S13  |
| <b>Figure S11.</b> $^1\text{H}$ - $^1\text{H}$ COSY and $^1\text{H}$ - $^{13}\text{C}$ HMBC correlations of 1-(3-methylbut-2-en-1-yl)-L-tryptophan ( <i>d</i> <sub>6</sub> -DMSO) <b>3d</b>                                                                                                            | S13  |
| <b>Figure S12.</b> Structural-based alignment of PriB (PDB ID 5INJ) with other C6 IPTs                                                                                                                                                                                                                 | S14  |
| <b>Figure S13.</b> Close-up view of the active site of the ligand-bound structures of C6 indole prenyltransferases showing residues that align with PriB His312                                                                                                                                        | S15  |
| <b>Figure S14.</b> Close up view of IptA and 6DMATSmO showing key distances                                                                                                                                                                                                                            | S15  |
| <b>Figure S15.</b> Nucleotide sequence of the codon optimized synthesized gene coding for IptA                                                                                                                                                                                                         | S16  |
| <b>Figure S16.</b> Nucleotide sequence of the codon optimized synthesized gene coding for 6DMATSSa                                                                                                                                                                                                     | S16  |
| <b>Figure S17.</b> Nucleotide sequence of the codon optimized synthesized gene coding for 6DMATSSv                                                                                                                                                                                                     | S17  |
| <b>Figure S18.</b> Nucleotide sequence of the codon optimized synthesized gene coding for 6DMATSmO                                                                                                                                                                                                     | S17  |
| <b>Figure S19.</b> SDS-PAGE of IptA, 6DMATSSa, 6DMATSSv and 6DMATSmO wild-type and mutant enzymes                                                                                                                                                                                                      | S18  |
| <b>Figure S20.</b> Circular dichroism spectra of IptA, 6DMATSSa, 6DMATSSv and 6DMATSmO wild-type and mutant enzymes                                                                                                                                                                                    | S19  |
| <b>Figure S21.</b> Steady state kinetics of recombinant 6DMATSmO wild-type and mutants 6DMATSmO_Y277H, 6DMATSmO_H329Y and 6DMATSmO_Y277H_H329Y                                                                                                                                                         | S20  |
| <b>Figure S22.</b> Sequence alignment of PriB with the AtmD, PaxD and JanD                                                                                                                                                                                                                             | S21  |
| <b>Figure S23.</b> Close up view of IptA (A and B) and 6DMATSmO (6DMATSmO (C and D) showing key distances                                                                                                                                                                                              | S22  |
| <b>III-Supporting Tables</b>                                                                                                                                                                                                                                                                           | S23  |
| <b>Table S1.</b> Primer names and sequences used in this study                                                                                                                                                                                                                                         | S23  |
| <b>Table S2.</b> Summary of molecular formula, calculated and observed high-resolution mass spectrometry data of prenylated tryptophans generated in study                                                                                                                                             | S24  |
| <b>Table S3.</b> $^1\text{H}$ (400 MHz) and $^{13}\text{C}$ (100 MHz) NMR spectroscopic data of (2 <i>S</i> )-3a-(3-methylbut-2-en-1-yl)-1,2,3,3a,8,8a-hexahydropyrrolo[2,3- <i>b</i> ]indole-2-carboxylic acid ( <i>d</i> <sub>6</sub> -DMSO) <b>3b</b>                                               | S24  |
| <b>Table S4.</b> $^1\text{H}$ (400 MHz) and $^{13}\text{C}$ (100 MHz) NMR spectroscopic data of ( <i>S</i> )-2-amino-3-(7-(3-methylbut-2-en-1-yl)-1 <i>H</i> -indol-3-yl)propanoic acid <b>3c</b> and 1-(3-methylbut-2-en-1-yl)-L-tryptophan <b>3d</b> ( <i>d</i> <sub>6</sub> -DMSO)                  | S25  |
| <b>Table S5.</b> Residues that align with PriB His312 (position 1) and Tyr364 (position 2) present in selected indole prenyltransferases                                                                                                                                                               | S26  |
| <b>IV-Supporting References</b>                                                                                                                                                                                                                                                                        | S27  |
| <b>V-Supporting Mass and NMR Spectra</b>                                                                                                                                                                                                                                                               | S28  |

## **I- Supporting Experimental Section**

Chemicals and reagents were purchased from Sigma-Aldrich or Fisher Scientific and were used without further purification unless otherwise stated. All solvents used were of ACS grade or higher and purchased from Fisher Chemical. The pET28a *E. coli* expression vector was purchased from Novagen. *E. coli* DH5a and BL21(DE3) competent cells were purchased from New England Biolabs. All DNA sequencing was conducted with the primers T7 promoter (5'-TAATACGACTCACTATAGGG-3') and T7 terminator (5'-GCTAGTTATTGCTCAGCGG-3') obtained from Integrated DNA Technologies. Nucleic acid sequencing was performed at Retrogen, Inc (San Diego, California) or ACGT, Inc (Wheeling, Illinois). Gene analysis and alignments were performed using Geneious 11.1.5. All protein structures analysis were illustrated using Molsoft ICM64. The 6DMATSsa and 6DMATSsv homology models were generated using SWISS-MODEL. Analytical TLC was performed on silica gel aluminum TLC plates purchased from Sigma-Aldrich. Visualization was accomplished with UV light (254 nm), staining with potassium permanganate solution or phosphomolybdic acid reagent and heating. Dimethylallyl pyrophosphate was purified by gravity column chromatography using silica gel (Silicycle) 60–100 or 100–200 mesh. PD-10 columns and Ni-NTA super flow columns were purchased from GE Healthcare. The NMR spectra were recorded at a 400 MHz for  $^1\text{H}$ , 100 MHz for  $^{13}\text{C}$  and 162 MHz for  $^{31}\text{P}$  using Bruker NMR spectrometer (Chapman University School of Pharmacy Nuclear Magnetic Resonance facility) and the one-dimensional  $^1\text{H}$ ,  $^{13}\text{C}$  and  $^{31}\text{P}$  as well as two-dimensional  $^1\text{H}$ - $^1\text{H}$  COSY,  $^1\text{H}$ - $^{13}\text{C}$  HSQC,  $^1\text{H}$ - $^{13}\text{C}$  HMBC and  $^1\text{H}$ - $^1\text{H}$  NOESY spectra were recorded at ambient temperature ( $\sim 25\text{ }^\circ\text{C}$ ) using 99.8%  $d_6$ -DMSO and  $\text{D}_2\text{O}$  obtained from Cambridge Isotope Laboratories as solvents for Trp-analogs and pyrophosphate substrates, respectively. Chemical shifts were referenced and calibrated to internal solvent resonances (DMSO,  $\delta_{\text{H}}$  2.50 ppm,  $\delta_{\text{C}}$  39.52 ppm;  $\text{D}_2\text{O}$ ,  $\delta_{\text{H}}$  4.79 ppm) and are reported in parts per million (ppm) with coupling constants  $J$  given in Hz. The following abbreviations were used to explain the multiplicities: s = singlet, d = doublet, t = triplet, q = quartet, m = multiplet. Spectra were processed with MestreNova (Mestrelab Research).

High Performance Liquid Chromatography (HPLC) analysis were performed using a Shimadzu HPLC LCMS-2020 equipped with a diode array detector SPD-M20A (HPLC methods A and B). Purification of derivatives of Tryptophan was performed on Shimadzu (Model CBM-20A) equipped with a diode array detector SPD-M40 (HPLC methods C) and Hitachi HPLC equipped with a diode array detector L-2455 (HPLC methods D). Signals were detected at  $\lambda = 230, 254, 280\text{ nm}$ . Low resolution (LR) and high resolution (HR)-ESI-MS experiments were carried out using Bruker Impact II Ultra High Resolution Qq-Time-Of-Flight mass spectrometry in the positive and negative mode equipped with Thermo Scientific DIONEX 3000 UHPLC (HPLC method E).

HPLC Method A: Ascentis™ C18 (5  $\mu\text{m}$ , 250 mm  $\times$  4.6 mm) column (Supelco) [25% B for 8 min, gradient of 25% B to 70% B over 40 min, 100% B for 5 min, 100% B to 25% B over 0.5 min, 25% B for 7 min (A = Milli-Q grade  $\text{H}_2\text{O}$  with 0.1% formic acid; B = Methanol with 0.1% formic acid, flow rate = 1.0  $\text{mL min}^{-1}$ ;  $A_{220, 254, 280}$ )].

HPLC Method B: Ascentis™ C18 (5  $\mu\text{m}$ , 250 mm  $\times$  4.6 mm) column (Supelco) [7% B for 3 min, gradient of 7% B to 100% B over 14 min, 100% B for 3 min, 100% B to 7% B over 0.1 min, 7% B for 5 min (A = Milli-Q grade  $\text{H}_2\text{O}$  with 0.1% formic acid; B = acetonitrile with 0.1% formic acid, flow rate = 1.0  $\text{mL min}^{-1}$ ;  $A_{220, 254, 280}$ )].

HPLC Method C: Ascentis™ C18 (5  $\mu\text{m}$ , 250 mm  $\times$  10 mm) column (Supelco) [15% B for 10 min, gradient of 15% B to 45% B over 45 min, 45 to 100% B for 0.5 min, 100% B for 5 min, 100% B to 15% B over 0.5 min, 15% B for 7.5 min (A = Milli-Q grade  $\text{H}_2\text{O}$  with 0.1% trifluoroacetic acid; B = acetonitrile with 0.1% trifluoroacetic acid, flow rate = 4.0  $\text{mL min}^{-1}$ ;  $A_{280}$ )].

HPLC Method D: Ascentis™ C18 (5  $\mu\text{m}$ , 250 mm  $\times$  10 mm) column (Supelco) 15% B for 10 min, gradient of 15% B to 45% B over 45 min, 45 to 100% B for 0.5 min, 100% B for 7 min, 100% B to 15% B over 0.5 min, 15% B for 7.5 min (A = Milli-Q grade  $\text{H}_2\text{O}$  with 0.1% formic acid; B = Methanol with 0.1% formic acid, flow rate = 4.0  $\text{mL min}^{-1}$ ;  $A_{280}$ )].

HPLC Method E: Titan™ C18 80 Å (1.9  $\mu\text{m}$ , 50 mm  $\times$  2.1 mm) column (Supelco) [7% B for 2 min, gradient of 7% B to 100% B over 8 min, 100% B for 2 min, 100% B to 7% B over 0.5 min, 7% B for 2.5 min (A = Milli-Q grade  $\text{H}_2\text{O}$  with 0.1% formic acid; B = acetonitrile with 0.1% formic acid, flow rate = 0.3  $\text{mL min}^{-1}$ ;  $A_{280}$ )].

## II-Supporting Figures

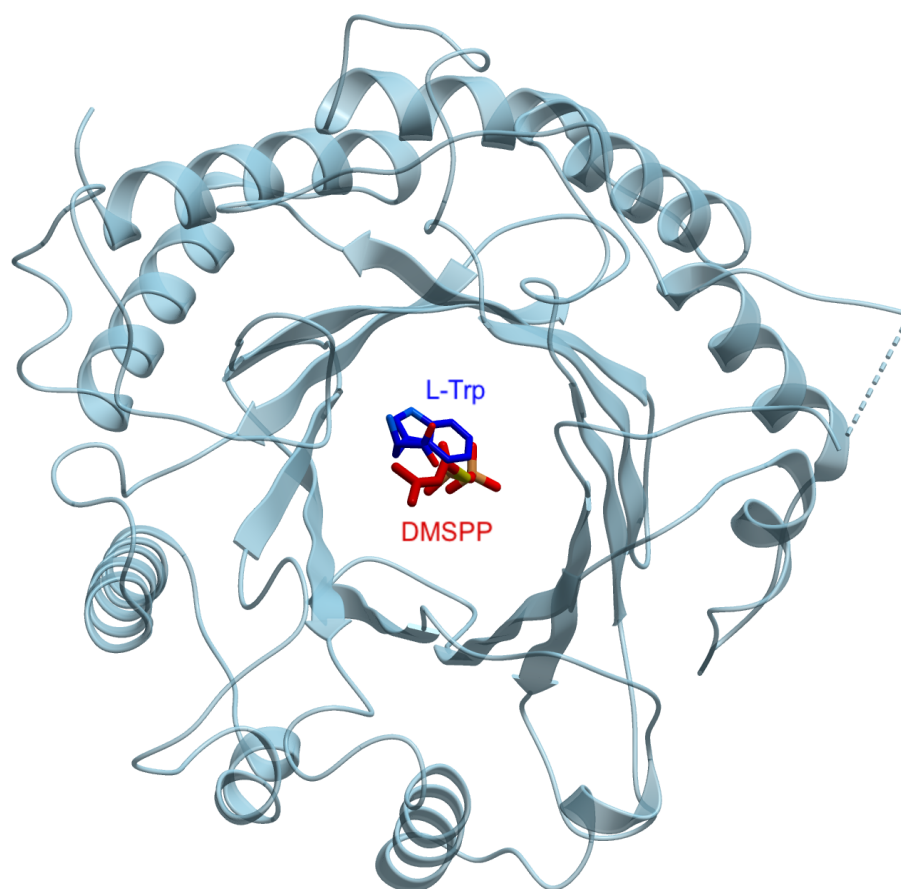

**Figure S1.** Overall X-ray crystal structure of ligand-bound PriB (PDB ID 5INJ) previously reported.<sup>[1]</sup> Protein structure depicted in cartoon representation. The ligands are illustrated as ball-and-stick models with the following color code: carbon, dark blue (L-Trp) and red (DMSPP); oxygen, light red; nitrogen, light blue; phosphorous, orange; sulfur, yellow.

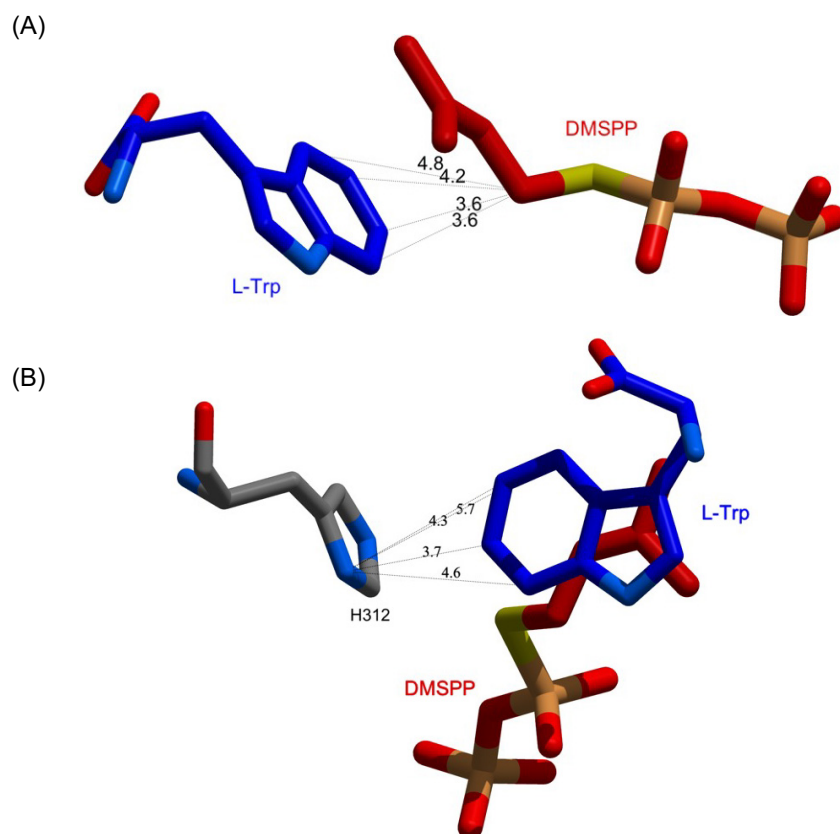

**Figure S2.** Close up view of the PriB active site. (A) Distance between DMAPP-analog C1' and each of the benzene carbons in tryptophan. (B) Distances between His312 basic nitrogen and each of the benzene carbons in tryptophan. Distances shown in Å.



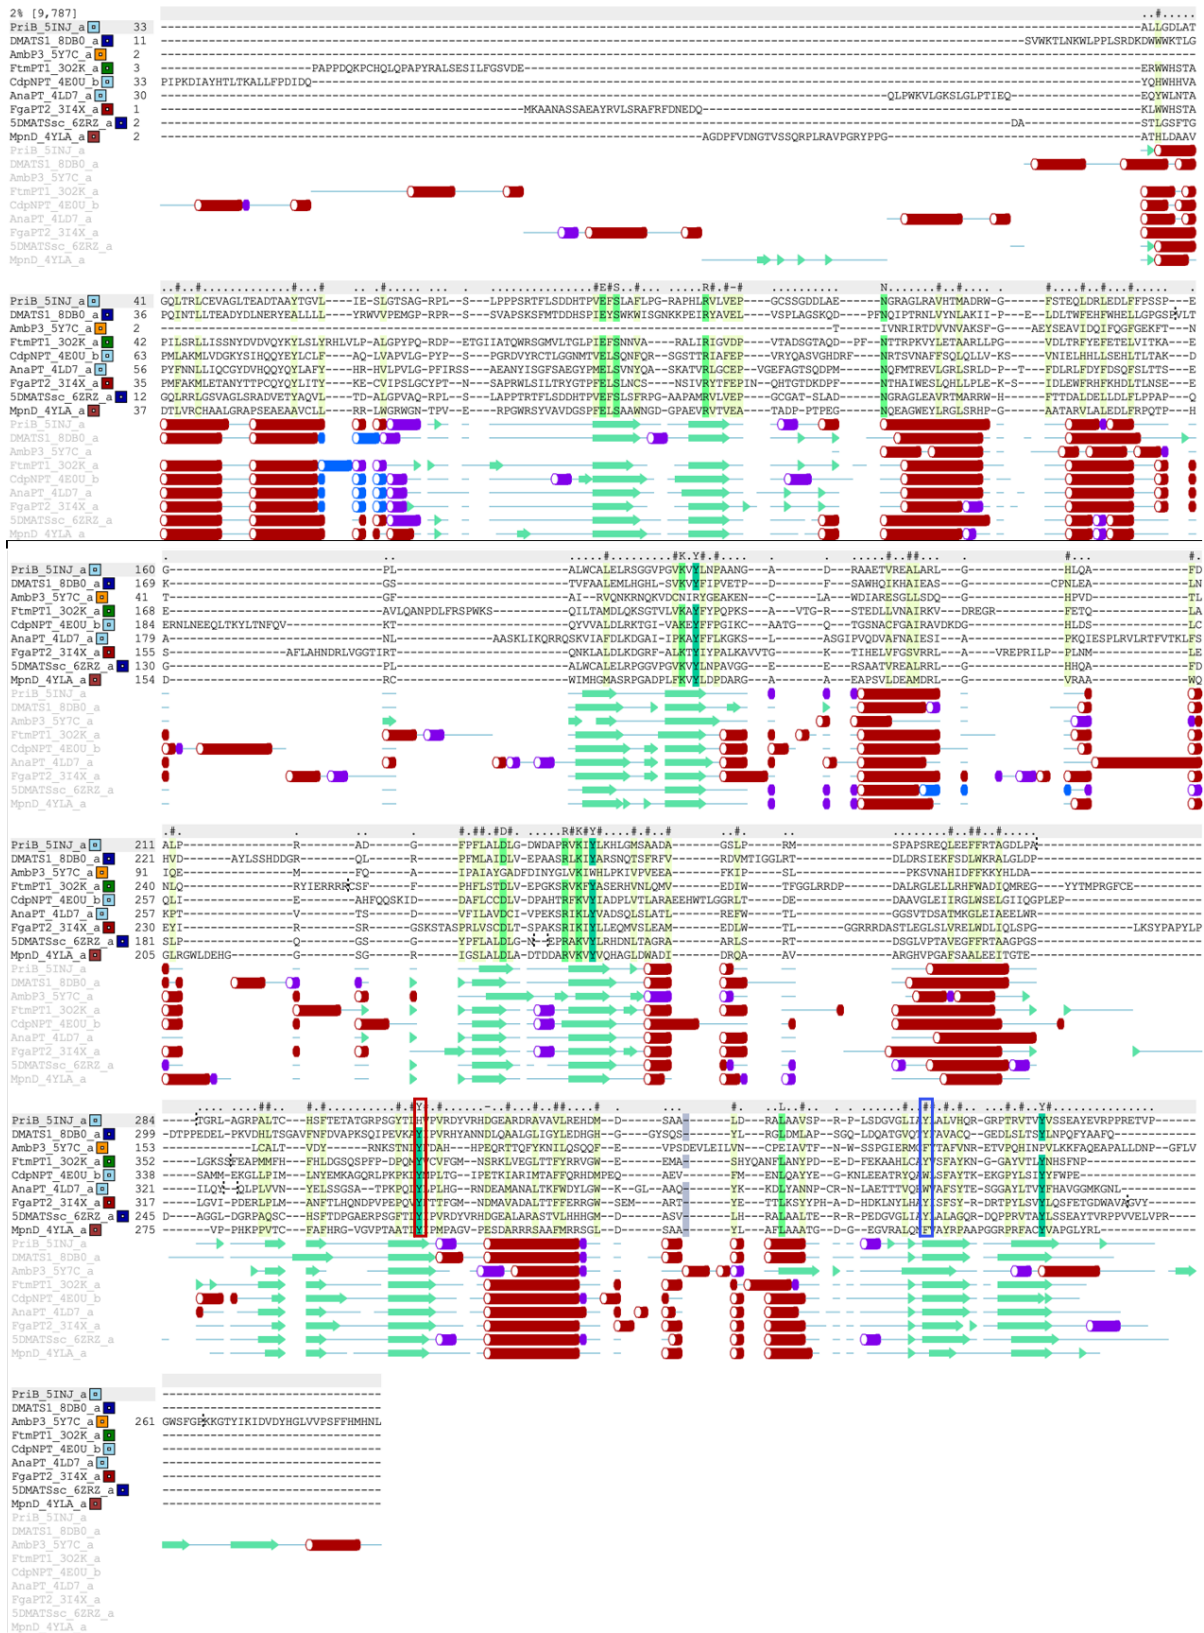

**Figure S3.** Structure-based alignment of PriB (PDB ID 51NJ, C6)<sup>[1]</sup> with other indole prenyltransferases; DMATS1 (PDB ID 8DB0, N1),<sup>[2]</sup> AmbP3 (PDB ID 5Y7C, C2),<sup>[3]</sup> FtmPT1 (PDB ID 3O2K, C2),<sup>[4]</sup> CdpNPT (PDB ID 4E0U, C3 rearranges to N1),<sup>[5]</sup> AnaPT (PDB ID 4LD7, C3),<sup>[6]</sup> FgaPT2 (PDB ID 314X, C4),<sup>[7]</sup> 5DMATSsc (PDB ID 6ZRZ, C5),<sup>[8]</sup> MpnD (PDB ID 4YLA, C7).<sup>[9]</sup> Red and blue square highlights residues that align with PriB His312 and Y364, respectively. Enzyme names and PDB ID are stated. Conserved residues are highlighted in green, pale green and yellow. Secondary structures are shown below the alignment.

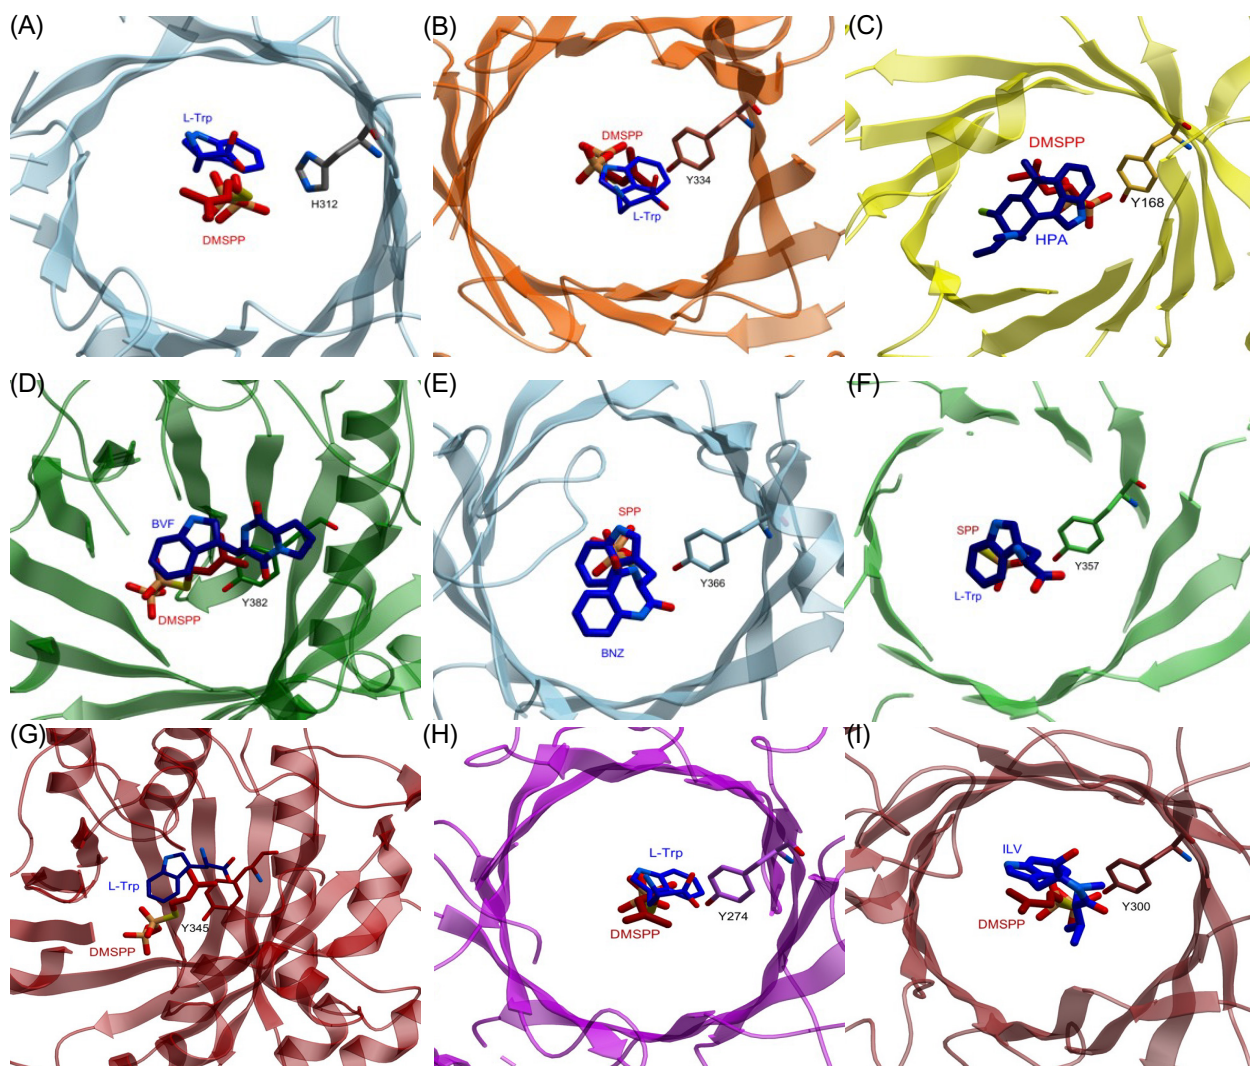

**Figure S4.** Close-up view of the active sites of the ligand-bound X-ray crystal structures of indole prenyltransferases showing residues that align with PriB His312. Enzymes shown are (A) PriB (PDB ID 5INJ),<sup>[1]</sup> (B) DMATS1 (PDB ID 8DB0, DMSPP added by docking),<sup>[2]</sup> (C) AmbP3 (PDB ID 5Y7C),<sup>[3]</sup> (D) FtmPT1 (PDB ID 3O2K),<sup>[4]</sup> (E) CdpNPT (PDB ID 4E0U),<sup>[5]</sup> (F) AnaPT (PDB ID 4LD7, L-Trp added by docking),<sup>[6]</sup> (G) FgaPT2 (PDB ID 3I4X),<sup>[7]</sup> (H) 5DMATSc (PDB ID 6ZRZ),<sup>[8]</sup> (I) MpnD (PDB ID 4YLA).<sup>[9]</sup> The ligands are illustrated as ball-and-stick models with the following color code: carbon, dark blue (L-Trp) and red (DMSPP). Enzymes are shown as ribbon, His312 and aligned residues are shown as sticks. L-Trp, L-tryptophan; DMSPP, dimethylallylthiophosphate; HPA, hapalindole A; BVF, brevianamide F; SPP, thiopeptide; ILV, indolactam V.

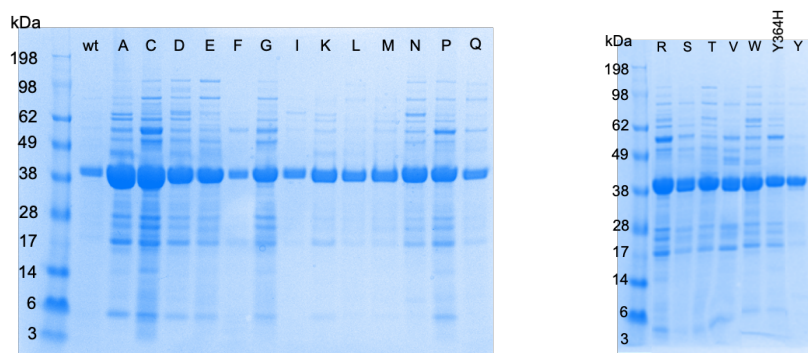

**Figure S5.** SDS-PAGE for *N*-His<sub>6</sub>-PriB wild-type (43.3 kDa, including a 2.2 kDa His tag) and mutant enzymes characterized in this study.

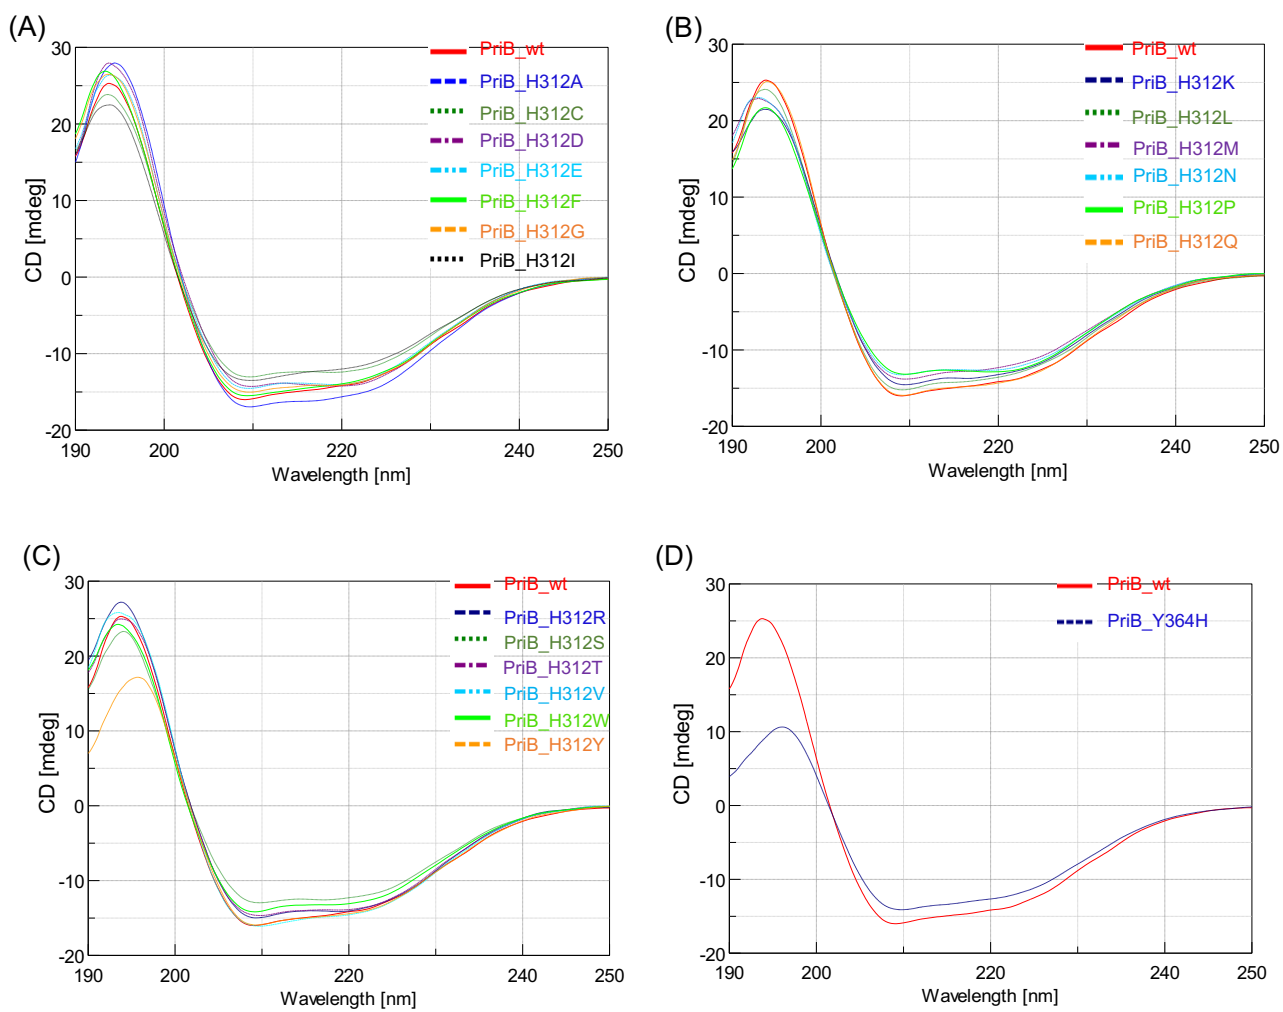

**Figure S6.** Circular dichroism spectra of PriB wild-type and mutant enzymes. Purified proteins were dissolved in 10 mM sodium phosphate buffer, 100 mM sodium fluoride at a concentration of approximately  $200 \mu\text{g ml}^{-1}$ . Spectra were recorded on a Jasco J1500 spectropolarimeter at 25 °C using quartz cells (Alpha Nanotech) with a pathlength of 0.1 cm.

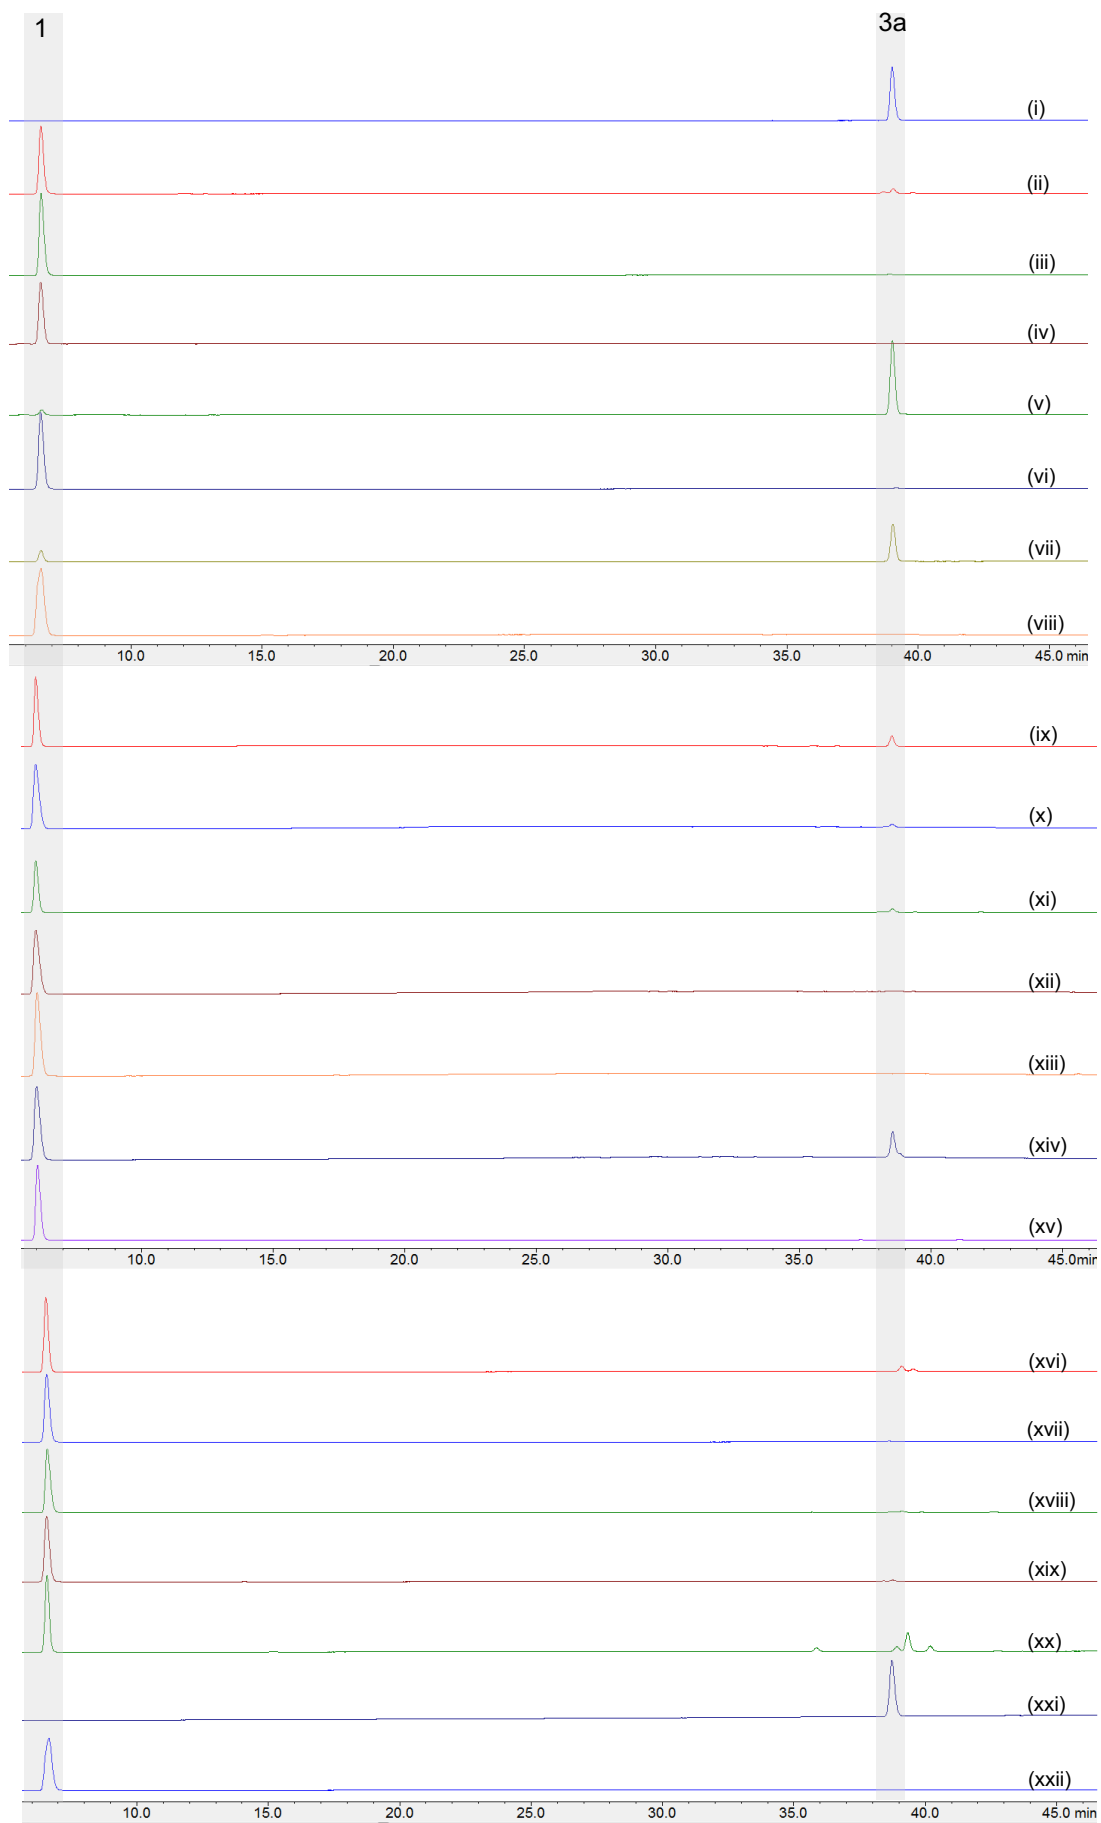

**Figure S7.** HPLC traces of wild-type and mutant PriB enzymatic reactions containing Tris 50 mM (pH 8.0) in 0.5 mM L-Trp (**1**) and 1 mM DMAPP (**2**) in the presence of 8.3  $\mu$ M wild-type PriB (i), PriB\_H312A (ii), PriB\_H312C (iii), PriB\_H312D (iv), PriB\_H312E (v), PriB\_H312F (vi), PriB\_H312G (vii), PriB\_H312I (viii), PriB\_H312K (ix), PriB\_H312L (x), PriB\_H312M (xi), PriB\_H312N (xii), PriB\_H312P (xiii), PriB\_H312Q (xiv), PriB\_H312R (xv), PriB\_H312S (xvi), PriB\_H312T (xvii), PriB\_H312V (xviii), PriB\_H312W (xix), PriB\_H312Y (xx), PriB\_Y364H (xxi) and no enzyme (xxii). Reactions were incubated at 37 °C for 16 h and quenched with 1 $\times$  methanol and monitored at A<sub>280</sub>. **1**, **3a** indicate L-Trp and 6-dimethylallyltryptophan, respectively.

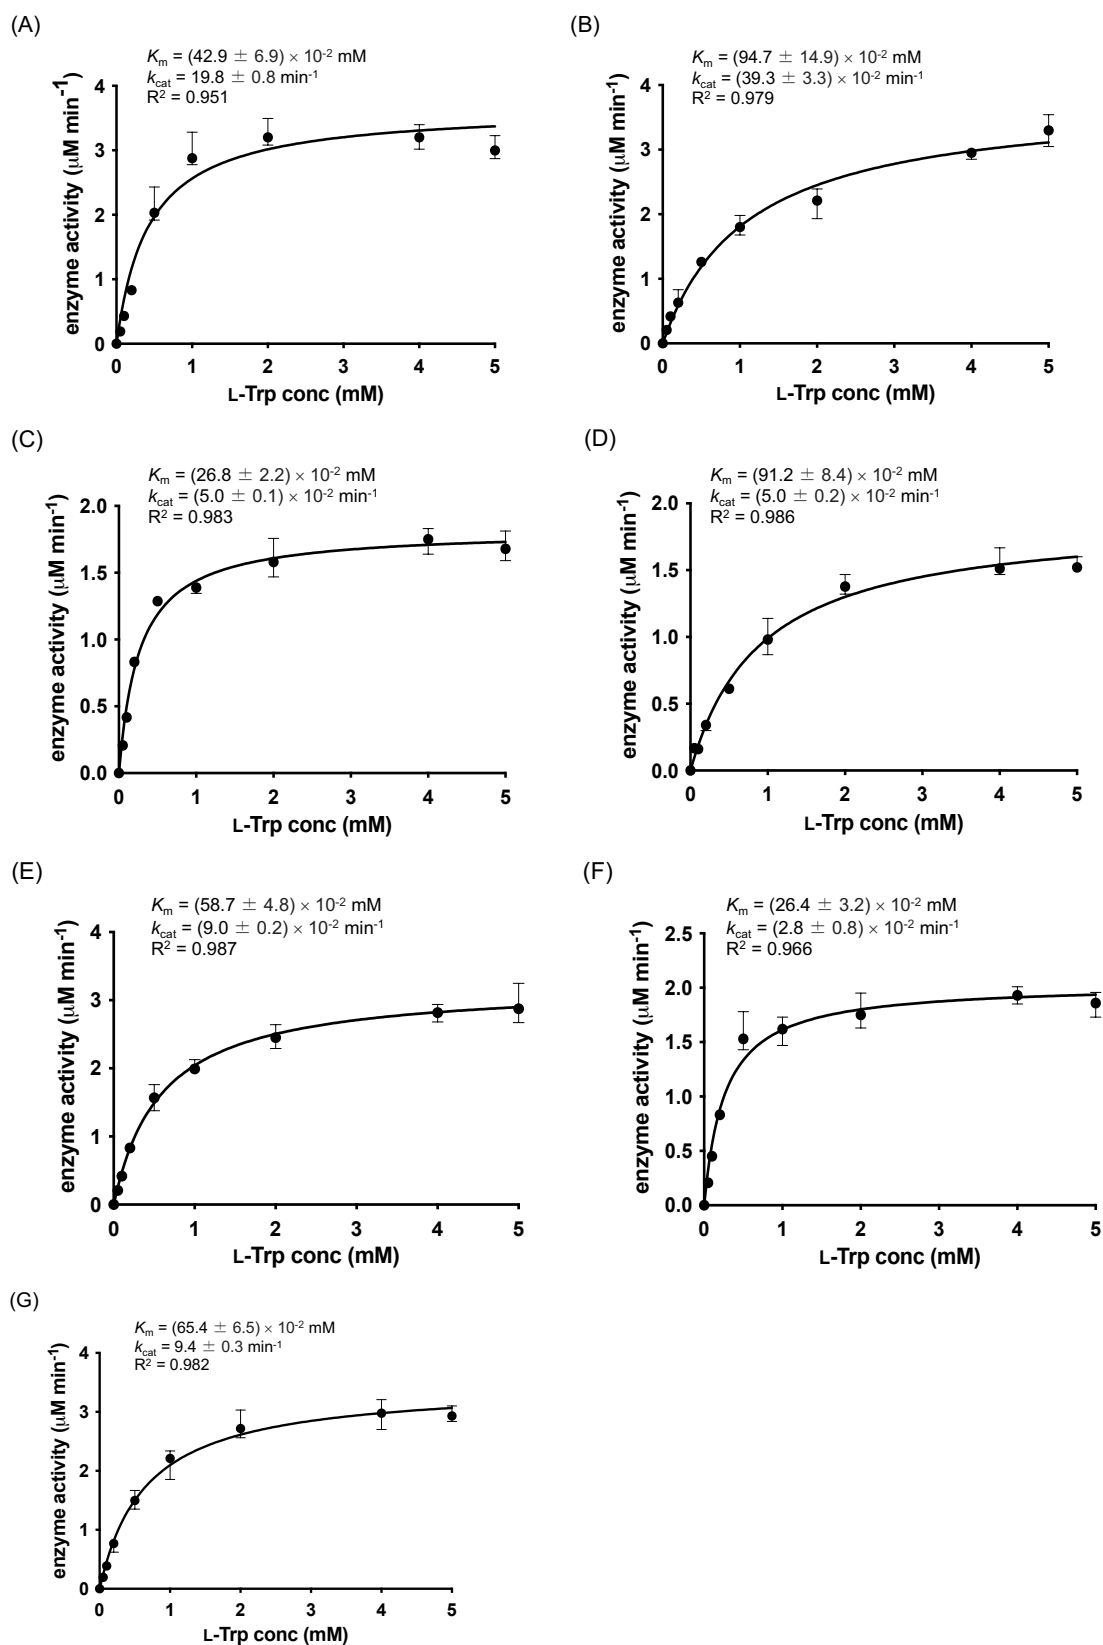

**Figure S8.** Steady state kinetics of recombinant wild-type and selected PriB mutants; (A)  $185 \times 10^{-3} \mu\text{M}$  wild-type PriB, (B)  $9.2 \mu\text{M}$  PriB\_H312E, (C)  $36.9 \mu\text{M}$  PriB\_H312G, (D)  $36.9 \mu\text{M}$  PriB\_H312K, (E)  $36.9 \mu\text{M}$  PriB\_H312Q, (F)  $73.8 \mu\text{M}$  PriB\_H312Y, (G)  $369 \times 10^{-3} \mu\text{M}$  PriB\_Y364H. Assays consisted of 50 mM Tris (pH 8.0), almost saturating DMAPP (2 mM) with variable L-Trp ( $5 \times 10^{-2} - 5 \text{ mM}$ ). Reactions were incubated at  $37^\circ\text{C}$  for 240 min.



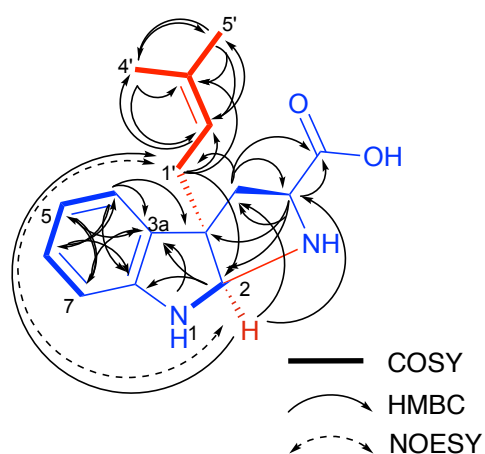

**Figure S9.**  $^1\text{H}$ - $^1\text{H}$  COSY (—),  $^1\text{H}$ - $^{13}\text{C}$  HMBC (—)  $^1\text{H}$ - $^1\text{H}$  NOESY (---) correlations of (2*S*)-3a-(3-methylbut-2-en-1-yl)-1,2,3,3a,8,8a-hexahydropyrrolo[2,3-*b*]indole-2-carboxylic acid ( $d_6$ -DMSO) **3b**.

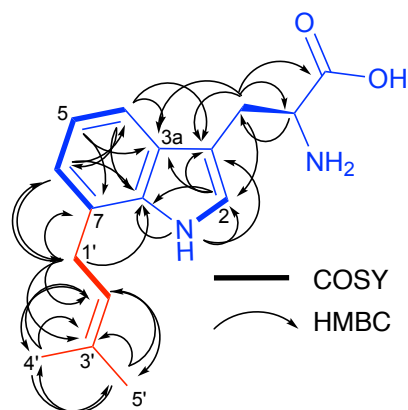

**Figure S10.**  $^1\text{H}$ - $^1\text{H}$  COSY (—) and  $^1\text{H}$ - $^{13}\text{C}$  HMBC (—) correlations of (*S*)-2-amino-3-(7-(3-methylbut-2-en-1-yl)-1*H*-indol-3-yl)propanoic acid ( $d_6$ -DMSO) **3c**.

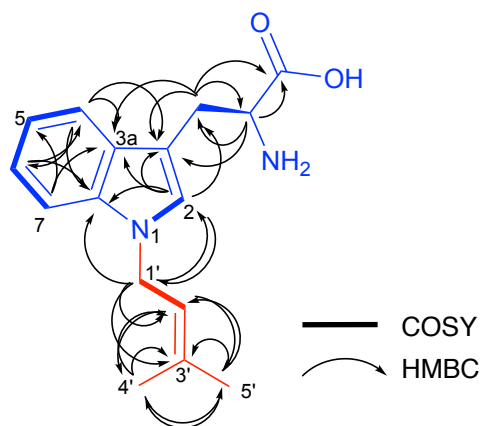

**Figure S11.**  $^1\text{H}$ - $^1\text{H}$  COSY (—) and  $^1\text{H}$ - $^{13}\text{C}$  HMBC (—) correlations of 1-(3-methylbut-2-en-1-yl)-L-tryptophan ( $d_6$ -DMSO) **3d**.



27% [5,383]

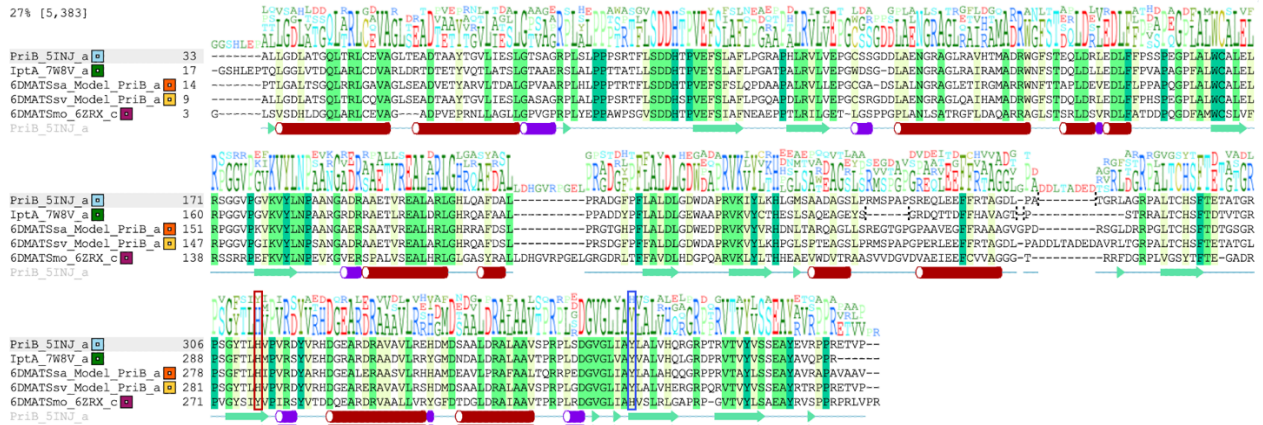

**Figure S12.** Structure-based alignment of PriB<sup>[1]</sup> (PDB ID 5INJ) with other C6 indole prenyltransferases; IptA<sup>[10]</sup> (PDB ID 7W8V), 6DMATSsa<sup>[11]</sup> (homology model to PriB), 6DMATSsv<sup>[11]</sup> (homology model to PriB) and 6DMATSmO<sup>[8]</sup> (PDB ID 6ZRXC). Red and blue square highlights residues that align with PriB His312 and Y364, respectively. Enzyme names and PDB ID are stated. Conserved residues are highlighted in green, pale green and yellow. PriB secondary structure is shown below the alignment.

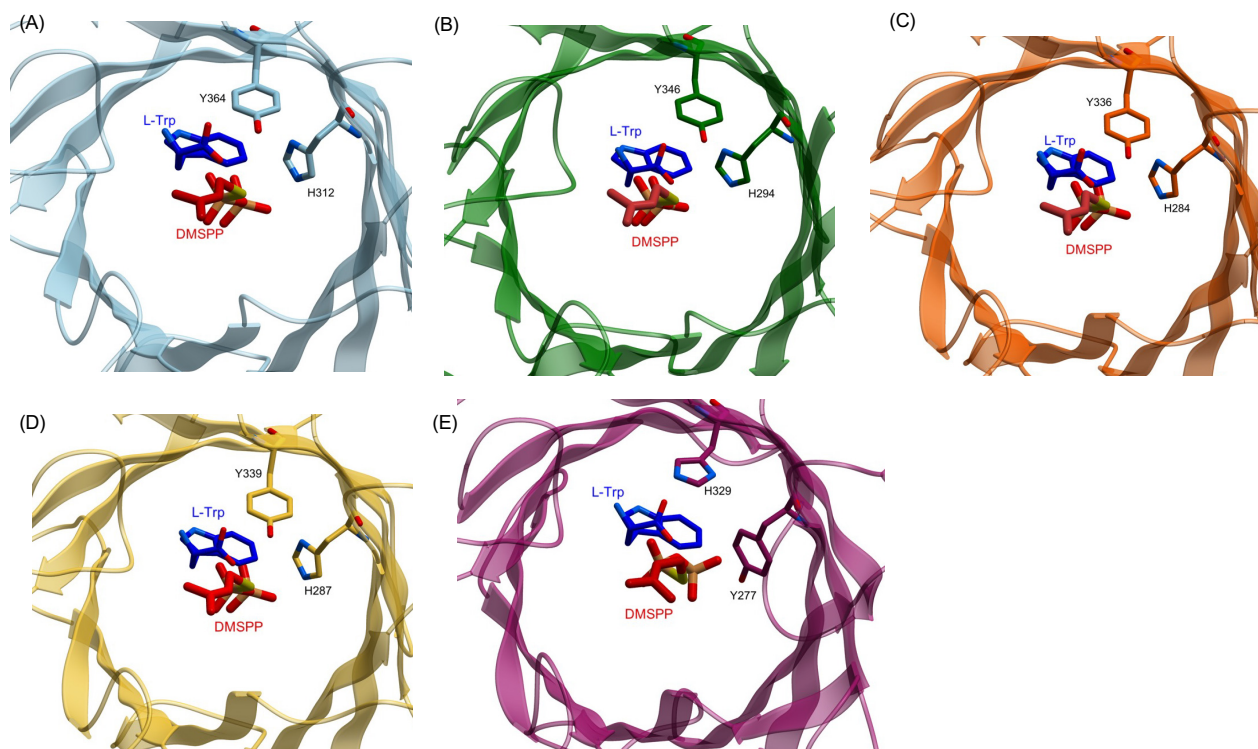

**Figure S13.** Close-up view of the active site of the ligand-bound structures of C6 indole prenyltransferases showing residues that align with PriB His312 and Tyr364. Enzymes shown are (A) PriB<sup>[1]</sup> (PDB ID 5INJ), (B) IptA<sup>[10]</sup> (PDB ID 7W8V), (C) 6DMATSsa<sup>[11]</sup> (homology model to PriB, docked with, (D) 6DMATSsv<sup>[11]</sup> (homology model to PriB) and (E) 6DMATSmO<sup>[8]</sup> (PDB ID 6ZRX). The ligands are illustrated as ball-and-stick models in dark blue (L-Trp) and red (DMSPP). Enzymes are shown as ribbon, His312/Tyr364 and aligned residues are shown as sticks. L-Trp, L-tryptophan; DMSPP, dimethylallylthiophosphate.

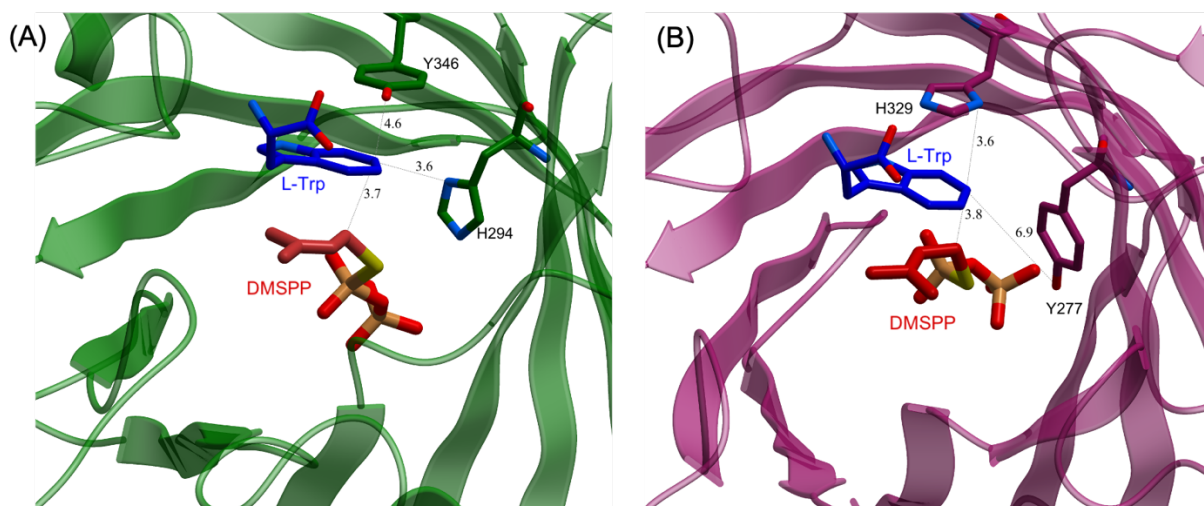

**Figure S14.** Close up view of (A) IptA<sup>[10]</sup> and (B) 6DMATSmO<sup>[8]</sup> showing key distances. The ligands are illustrated as ball-and-stick models in dark blue (L-Trp) and red (DMSPP). Enzymes are shown as ribbon, His294/Tyr346 (A) and Tyr377/His329 are shown as sticks. L-Trp, L-tryptophan; DMSPP, dimethylallylthiophosphate. Distances shown in Å.

5' –

ATGGTCACAGGGGGCCGTAGCCCCATGTGCGATACCGTCGGCAGTTCATTGGCACGTCTGGAACCCACTCAAC  
TTGGGGGTTTTGGTGACAGACCAACTGGCTCGTCTTTGTGATGTTGCAAGACTGGACCGTACCGACACAGAGAC  
CTATGTGCAGACACTGGCAACATCGTTAGGTACTGCAGCAGAGAGATCGCTTGCTTTGCCGCCGACGACGGCA  
ACCCTGCTGAGCGACGACCACACACCTGTAGAATACTCGTTAGCATTCTTGCCAGGTGCTACACCGGCTCTTC  
GGGTTTTAGTTGAGCCAGGTGGGATAGCGGTGACTTGGCAGAAAATGGCCGCGCGGGCCTTCGTGCTATTCG  
GGCAATGGCCGACCGTTGGAACTTTTCAACAGATCAATTGGACCTTTTGGAGGATTTGTTTTTTCCCGTCGCA  
CCAGCGGGTCCCTTTCGCACTTTGGTGTGCCCTTGAACCTCGCCCTGGCGGCGTGCCAGGAGTTAAGGTCTACC  
TGAACCCCGCGGCACGTGGCCGTGACCGCCGCGCCGAAACTTTGCGCGAGGCATTAGATCGTTTTAGGTCATCG  
TCAGGCTTTCGCCGCACTGCCCCGGCGGATGACTATCCGTTTCTGGCTTTAGACTTAGGGGAGTGGGCGGCG  
CCGCGTGTA AAAAGTTTATTGCACACATGAATCCCTGTCAGCTCAAGAAGCGGGCAGTATTCGAGACTTGACG  
CCGCCGACGGGAGAGACCAGACCACAGATTTTTTTTTCATGCCGTAGCAGGAACTGATGCTGGCGGGACTGGCCA  
ACCGTCTACTCGCCGTGCTTTAACATGCCATAGTTTCACTGACACTGTTACTGGGCGTCCCAGTGGTTTTACA  
CTTCACATGCCCGTACGGTCTTACGTGGAGCACGATGGAAGAGCACGCGACCGGGCAGCAGATGTCTTGAGAC  
GCTACGGGATGGATAACGATGCTCTGGATAGAGCCTTAGCGGGCGGTGACGCCACGCCCTTGGATGACGGAGT  
AGGACTGGTTGCTTACGTAGCTTTGGTGCATCAGTTGGGTGCGGGACCCAAGAGTGACAGTATACGTTAGCTCG  
GAGGCATACGCAGTTCAGCCCCCGTACAGCGTTAGCCACTGGGCGGGGATCGGTCTTAA-3'

**Figure S15.** Nucleotide sequence of the codon optimized synthesized gene coding for IptA.

5' –

ATGACAACCGTACGTACAGGGGCTGAACCGGGTGGCGCACCAACTTTGGGCGCCTTAACATCAGGACAGTTGC  
GCCGTTTTAGGTGCTGTTGCGGGCTTAAGTGAAGCAGACGTAGAAACCTATGCGCGCGTCCCTACCGATGCACT  
GGGTCGCCGTTGCGGCTCGCCCTTACATCTGCCACCACCGACCCGTACGTTTCTCAGTGACGATCATACGCCG  
GTAGAATTCTCATTCTCTTTACAACCTGATGCAGCTCCAGCACTTCGTGTGCTGCTGGAGCCAGGATGTGGTG  
CTGATTCCTTGGCATTAAATGGTCGCGCTGGCTTAGAGACAATTCGTGGCATGGCACGTCGTTGGAATTTAC  
TACAGCACCTTTAGATGAGGTGAGGATTTATTTCTGCCACCTGCCCCACAAGGTCCATTGGCGTTGTGGTGT  
GCGCTCGAATTACGTCCAGGTGGTGTTCCTAAAGTCAAAGTTTACCTCAATCCAGCAGCTAATGGAGCAGAAC  
GCTCGGCTGCAACCGTACGTGAAGCGCTCCATCGTTTAGGACATCGTCGTGCGTTTGATTCTCTTCCCTCGTGG  
TACCGGCCATCCGTTCCCTTGCATTGGATCTGGGTGACTGGGAAGATCCTCGTGTGAAAGTCTACGTGCGTCAT  
GACAATCTCACCGCTCGTCAAGCGGGGCTTCTGAGCCGTGAGGGAACAGGTCCTGGTCTGCAGCAGTGGAAAG  
GCTTCTTTTCGTGCCGAGCTGGCGTCCGATCGTTTACAGTCTTGCATATTCGGTTCGTGATTATGCACGT  
TTCATTTACGGATACGGGACAGTGGTCCGAGCGGCTTTACCTTGCATATTCGGTTCGTGATTATGCACGT  
CATGATGGCGAGGCCTTGAACGTGCGGCTAGTGTCTTCTGTCACCATGCGATGGATGAAGCAGTTCGCTC  
GCGCTTTTGTGCTGATTAACCTAACGTCGCCCCGAGGATGGCGTTGGCTTGATTGCATATCTGGCACTGGCACA  
TCAACAAGGTGCTCCACCTCGTGTGACCGCATATTTGAGCTCCGAGGCGTATGCGGTCCGCGCCCCAGCCGTA  
GCGGCGGTTTCGTGCTCCTGTAGCAGTCCGTTGA-3'

**Figure S16.** Nucleotide sequence of the codon optimized synthesized gene coding for 6DMATSsa.

5' –

ATGAACGGATTCCATT CAGGCGAAGCCTTACTTGGAGACTTAGCAACCTCGCAATTAACCCGTTTATGCCAGG  
TCGCAGGGTTGTCTGAGGCTGATACCGCAGCCTATACTGGCGTACTGATCGAATCCCTGGGAGCCAGCGCAGG  
GCGTCCCTTGGCTTTGCCCCACCCTCACGTACGTTTCTTTCTGACGACCATAGTCCAGTTGAGTTCAGTTTG  
GCCTTCCTGCCAGGACAAGCACCAGGACTTGCCTGTACTGGTGGAAACCGGGATGCTCTCGTGGGGACGACTTGG  
CTGAGAATGGGCGGGCAGGTCTTCAGGCAATCCATGCTATGGCCGACCGTTGGGGATT CAGCACGGATCAATT  
AGATCGCCTGGAAGACTTGTCTTCCCGCACTCGCCTGAAGGCCCACTTGCCTTTGGTGCCTCTGGAGTTA  
CGGCCGGGTGGTGTTCCTGGGATTAAGTCTATCTTAATCCTAGTGCAAATGGCGCTGATCGCGCCGCTGAAA  
CCGTTTCGCGAAGCCCTGGCGCGCCTTGGGCACCGGCAAGCGTTTCGATTCCCTTCCCGGT CAGACGGATTTCC  
CTTCTTCGCCTTAGACTTGGGTGATTGGGATGCTCCACGGGTAAAAGTTTACCTGAAACACCCGGGCCTTTCA  
CCTACAGAGGCCGGTAGCCTGCCACGTATGTCACCTGCACCCGGGCCCGAGCGCCTGGAAGAGTTCTTTCGGA  
CGGCGGGAGACTTACCCGCTGACGATTTGACGGCAGATGAGGATGCGGTACGCCTTACAGGCAGACCCGCTCT  
GACCTGCCACAGCTTTACAGAGACAGCAACTGGCCTTCTTCTGGTTATACGCTGCATGTTCCCGTAAGAGAT  
TACGTCCGGCATGACGGTGAGGCGGGAGCGTGCTGTTGCCGTTTTACGTTTCGCATGACATGGACTCAGCAG  
CCTTGGATCGGGCTTTGGCCGCCGTTTCCCTTCGCCCTTAGGAGACGGAGTAGGGCTTATTGCCTATCTTGC  
TCTTGTACACGAGAGAGGCAGACCGCAACGTGTTACTGTGTACGTCTCATCCGAGGCCTATAGA ACTCGGCCT  
CCGCGCGAGACCGTACCGACGCGCACCGGGTGCCTGCCGGGCTGTAA–3'

**Figure S17.** Nucleotide sequence of the codon optimized synthesized gene coding for 6DMATSsv.

5' –

ATGGCGGGTCTGTCTGTTTCTGACCACCTGGACGGTCAGCTGGCGCGTCTGTGCGAAGTTGCGGGTGC GGACC  
CGGTTGAACCGCGTAACCTGCTGGCGGGTCTGCTGGGTCCGGTTGGTCCGCGTCCGCTGTACGAACCGCCGGC  
GTGGCCGTCTGGTGTCTGACGACCACACCCCGGTTGAATTTCTCTATCGCGTTCAACGAAGCGGAACCGCCG  
ACCCTGCGTATCCTGGGTGAAACCCTGGGTTCTCCGCCGGGTCCGCTGGCGAACCTGTCTGCGACCCGTGGTT  
TCCTGGACGCGCAGGCGCGTCTGCGGGTCTGTCTACCTCTCGTCTGGACTCTGTTTCGTGACCTGTTTCGCGAC  
CGACGACCCGCAGGGTGACTTCGCGATGTGGTGTCTCTGGTTTTCCGTTCTTCTCGTCCGGAATTCAAA  
GTTTACCTGAACCCGGAAGTTAAAGGTGTTGAACGTTCTCCGGCGCTGGTTTTCTGAAGCGCTGCACCGTCTGG  
GTCTGGGTGCGTCTTACCGTGCGCTGCTGGACCACGGTGTTCGTCCGGGTGAACTGGGTGCTGGTGACCGTCT  
GACCTTCTTCGCGTTGACCTGCACGACGGTCCGCAGGCGCGTGTAAACTGTACCTGACCCACCACGAAGCG  
GAAGTTTGGGACGTTACCCGTGCGGCGTCTGTTGTTGACGGTGTGACGTTGCGGAAATCGAAGAATTCGCG  
TTGTTGCGGGTGGTGGTACCCGTCGTTTCGACGGTCTGCGTGGTTGGTTCTTACACCTTACCGAAGGTGC  
GGACCGTCCGGTTGGTTACTCTATCTACGTTCCGATCCGTTCTTACGTTACCGACGACCAGGAAGCGCGTGAC  
CGTGTTCGCGGCGCTGCTGGTTGTTACGGTTTCGACACCGACGGTCTGGACCGTGCGATCGCGGCGGTTACCC  
CGCGTCCGCTGCGTGACGGTGTGGTCTGATCGCGCACGTTTTCTCTGCGTCTGGGTGCGCCGCGTCCGGGTGT  
TACCGTTTACCTGTCTGCGGAAGCGTACCGTGTCTCCGCCGCGTCCGCGTCTGATGCCGGCGGGTCTGTGAC  
GTTTCTCCGGCGCCGGTTGGTCTGTTACCCGTCCGTAA–3'

**Figure S18.** Nucleotide sequence of the codon optimized synthesized gene coding for 6DMATSmO.

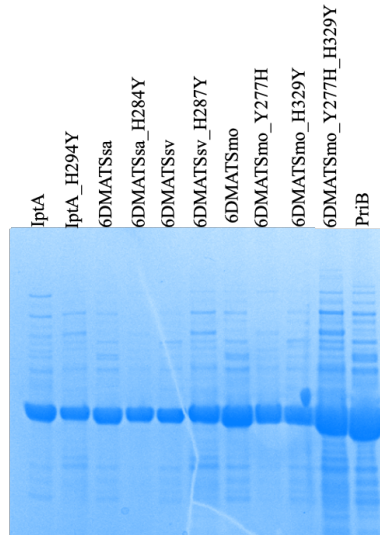

**Figure S19.** SDS-PAGE for *N*-His<sub>6</sub>-IptA (43.5 kDa, including a 2.2 kDa His tag), *N*-His<sub>6</sub>-6DMATSsa (42.1 kDa, including a 2.2 kDa His tag), *N*-His<sub>6</sub>-6DMATSsv (43.0 kDa, including a 2.2 kDa His tag), *N*-His<sub>6</sub>-6DMATSmo (42.8 kDa, including a 2.2 kDa His tag) wild-type and mutant enzymes characterized in this study.

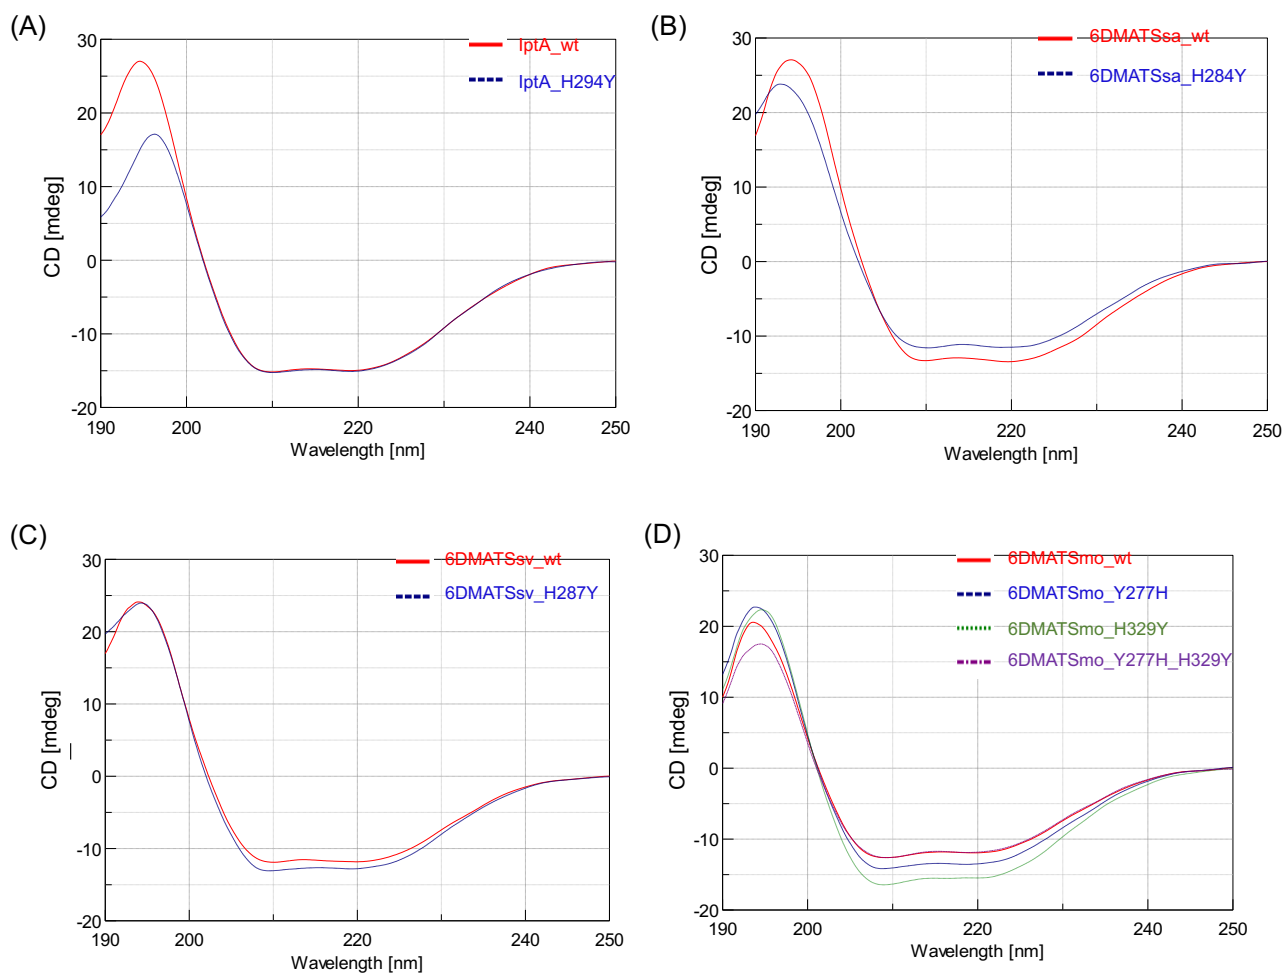

**Figure S20.** Circular dichroism spectra of (A) IptA, (B) 6DMATSsa, (C) 6DMATSsv and (D) 6DMATSmo wild-type and mutant enzymes. Purified proteins were dissolved in 10 mM sodium phosphate buffer, 100 mM sodium fluoride at a concentration of approximately  $200 \mu\text{g ml}^{-1}$ . Spectra were recorded on a Jasco J1500 spectropolarimeter at  $25^\circ\text{C}$  using quartz cells (Alpha Nanotech) with a pathlength of 0.1 cm.

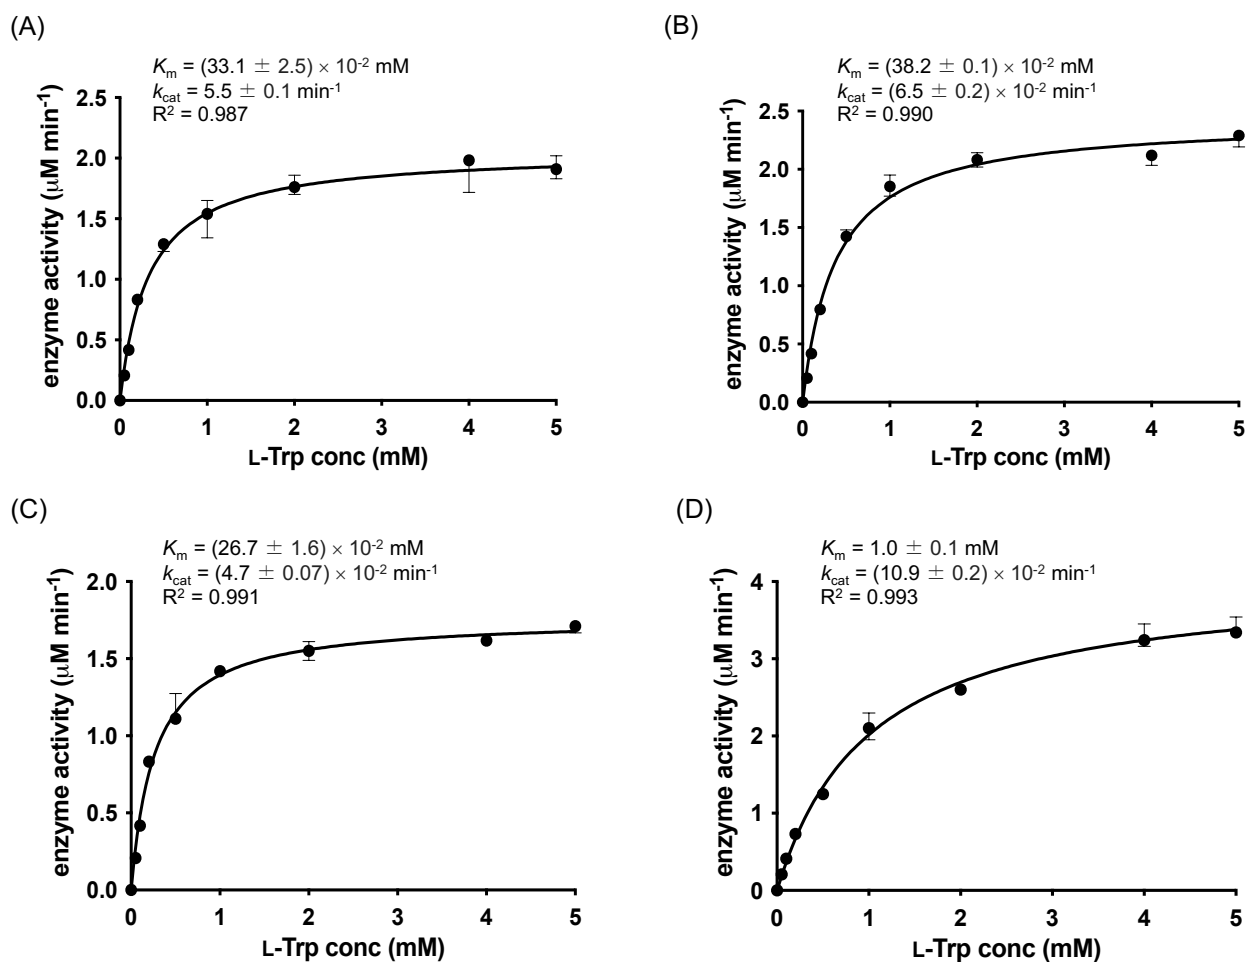

**Figure S21.** Steady state kinetics of recombinant (A)  $374 \times 10^{-3}$   $\mu\text{M}$  6DMATSmo wild-type and mutants (B) 37.4  $\mu\text{M}$  6DMATSmo\_Y277H, (C) 37.4  $\mu\text{M}$  6DMATSmo\_H329Y, (D) 37.4  $\mu\text{M}$  6DMATSmo\_Y277H\_H329Y. Assays consisted of 50 mM Tris (pH 8.0), almost saturating DMAPP (2 mM) with variable L-Trp ( $5 \times 10^{-2}$  – 5 mM). Reactions were incubated at 37 °C for 240 min.

```

PriB  MGGPMS-----GFHSGEALLGDLATGQ-LTRLCEVAGLTEADTAAYTGVLIESLIGTSAG-RP
AtmD  MSTPKSDTCSPHQALARGMGFKNHHERLWWATFGPLLEKLLALCNYPVSLQYQHLSFLYHHLLPYLGPYP
JanD  MGSHEVEL-RPWQSLAAGLGFSSPDEEYWWTAFAQPLNQLMEWADYSIAEQYRVLAFLHRYVIPTCGPKP
PaxD  MQSDELQI-PPWESLAEGLGFSNADEEYWWTVFGQPLNKLMDWADYSTSEKYRVLAFLHRYVIPTCGPRP
PriB  LSLPPPS-RTFLSDDHTPVEFSLAFLLPGRAPHLRLVVEPGCSSGDDLAE-NGRAGLRAVHTMADRW-GFS
AtmD  TVENGFAWKTAYSPDGTPAEVSLNFDGPKTVRMDHVPISQWSGTPKDPFCQNVALELTKSLAGTLPDFT
JanD  YRNGEQYWKTFMGFDHTPIQVSINFYNSKATVRTANIPICALSGSALDPINQKATADTLKAQKHLAPGND
PaxD  KPNGDQYWDTFMGFDHTPIQVSINFYNSKATVRTANIPISEASGTTEDPINQKASLDTIASQRHLVPGHN
PriB  TEQLDRLEDLFFPSSPEGPL-----ALWCALELRSGGVPGVKVYLNPAANGADRAAETVR-----
AtmD  WDWFNHFVQTMFIPEPATDVVLAR-EPPNFRRMAMQSVNGCDLLTAGVRVKPVFNALWKSIETGIPHDKL
JanD  LRWEEHFAKAFLPNDEAHLINAKVSDRVLAMQGVQGMLSYDFPPNRTQTKVAMSPIWKHIETGRPIGDL
PaxD  LRLEKHFTDAFFIPNEEANLNAELENRTIAMQAVQCMLSYDFPYRQIQTKVAICPMWKSMQVKRPMGDL
PriB  -----EALARLGHLQAFDALPRADGFP-----FLALD---LGDWDAPRVKIYL---KHLGMSA
AtmD  LFDSIRNNTELFGAYLPALQVIEDYCQSDRAKEFQTRGCFLSFD---ATSIKDARLKVYLHGPQTAYMKV
JanD  MIQSIKDLGDEATGYMQSLQVLEEFIESEAAKDAGVSPAFAFDTNLSENYKSSRIKIYLATPRTAFNRM
PaxD  MISSIKDLGIDAADYMKSLKVIEDFINSEKAVQSGAYAIHFAFDTMLTDDYQRTRVKIYFATQSTAFNNM
PriB  ADAGSLPRMSPAPSREQLEFFFRT--AGDLPAPGDPGPTEDT-GRLAGRPALTCHSFTETATATGRPSGYTL
AtmD  EDAFTLGGRLSNPIQTGVKELRKLWYAVINLPSDFPESEDL-PATDDLYQGWLVNYELRPNNPVPEPKV
JanD  VDIFTLGGRLNGPEMDRATQALRLLWSSVINVEGLLDNDIVPKNPHRCACVIFNFEIWPGASVLPTPKI
PaxD  VDIFTLGGRLDGPEMQRATKELRKLWMSTMAIPDGLRDDETL-PKSPLPCAGVIFNFEIWPGADKPNPKI
PriB  HVPVRDYVRHDGEARDRAVAVLREHDMDSAALDRALAAVSPRLSDGVGLIAVLALVHQRGRPTRVIVY
AtmD  YIPVAINNKDQDSIVQGLQEFFDRHE-SMDVRDYRDIFETLFLDAKNPTGIHFITFSYKAHP-YVICYY
JanD  YLPAAYYGKPDLEIAEGMDVFFKSQGWNQPFHSYTDNYAKAFLRDQKVTCRHDISFSYKGEGAYVIAYY
PaxD  YLPCAYYGKDDLDIADGMDSFFKDQGWSKSFHSYKDNYIKAFVKDGKVMCRHDISFSYKGQGAYIIAYY
PriB  SSEAYEVRPPPRETVPTRDRARARL
AtmD  KPHLEPV--PAKELEESDVKGLSK
JanD  KPELDAFADAATWVPE-----IYK
PaxD  KPELSEYADPSVWAPKLF-----KA

```

**Figure S22.** Sequence alignment of PriB with AtmD,<sup>[12]</sup> JanD<sup>[13]</sup> and PaxD.<sup>[14]</sup> Red boxes highlight amino acid residues that align with PriB His312 and Tyr364.



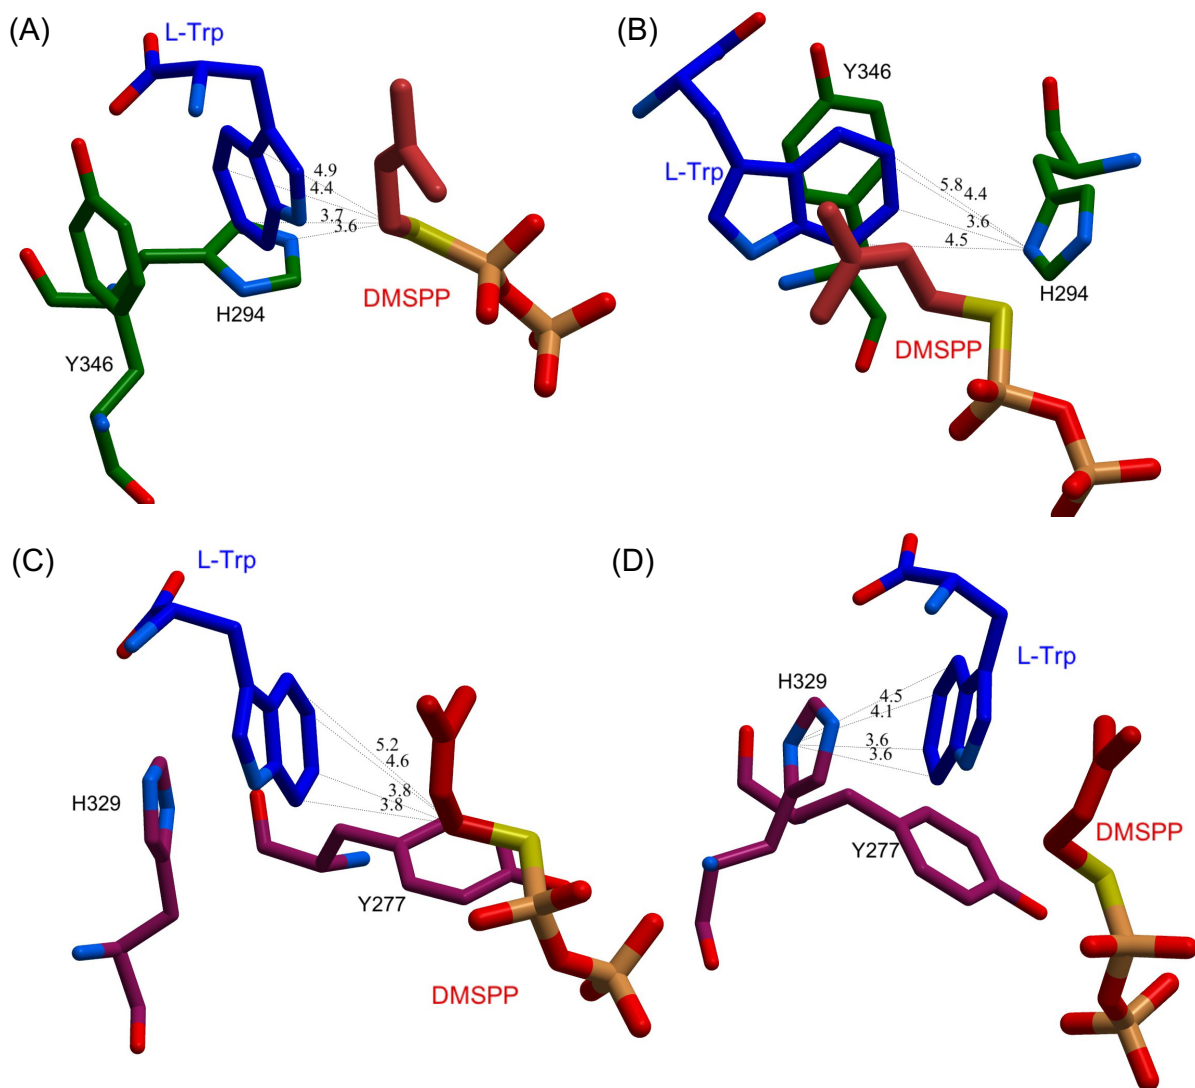

**Figure S23.** Close up view of IptA<sup>[10]</sup> (A and B) and 6DMATSm<sup>[8]</sup> (C and D) showing key distances. The ligands are illustrated as ball-and-stick models in dark blue (L-Trp) and red (DMSPP). His294/Tyr346 (A and B) and Tyr377/His329 (C and D) are shown as sticks. L-Trp, L-tryptophan; DMSPP, dimethylallylthiophosphate. Distances shown in Å.

### III-Supporting Tables

**Table S1.** Primer names and sequences used in this study. Underlined nucleotide residues are sites of mutations.

| Primer Name      | Primer Sequence                                                          |
|------------------|--------------------------------------------------------------------------|
| PriB_H312A-F     | 5'-CTA CAC CCT <u>CGC</u> TGT GCC GGT CCG CGA CTA CGT CCG G-3'           |
| PriB_H312C-F     | 5'-CTA CAC CCT <u>CTG</u> TGT GCC GGT CCG CGA CTA CGT CCG G-3'           |
| PriB_H312D-F     | 5'-CTA CAC CCT <u>CGA</u> TGT GCC GGT CCG CGA CTA C-3'                   |
| PriB_H312E-F     | 5'-CTA CAC CCT <u>CGA</u> AGT GCC GGT CCG CGA CTA CG-3'                  |
| PriB_H312F-F     | 5'-CTA CAC CCT <u>CTT</u> TGT GCC GGT CCG CGA CTA CGT CCG G-3'           |
| PriB_H312G-F     | 5'-CTA CAC CCT <u>CGG</u> TGT GCC GGT CCG CGA CTA CGT CCG G-3'           |
| PriB_H312I-F     | 5'-CTA CAC CCT <u>CAT</u> TGT GCC GGT CCG CGA CTA CGT CCG G-3'           |
| PriB_H312K-F     | 5'-CTA CAC CCT <u>CAA</u> AGT GCC GGT CCG CGA CTA C-3'                   |
| PriB_H312L-F     | 5'-CTA CAC CCT <u>CTT</u> AGT GCC GGT CCG CGA CTA CGT CCG G-3'           |
| PriB_H312M-F     | 5'-CTA CAC CCT <u>CAT</u> GGT GCC GGT CCG CGA CTA CGT CCG GCA CGA CGG-3' |
| PriB_H312N-F     | 5'-CTA CAC CCT <u>CAA</u> TGT GCC GGT CCG CGA CTA C-3'                   |
| PriB_H312P-F     | 5'-CTA CAC CCT <u>CCC</u> TGT GCC GGT CCG CGA CTA CGT CC-3'              |
| PriB_H312Q-F     | 5'-CTA CAC CCT <u>CCA</u> AGT GCC GGT CCG CG-3'                          |
| PriB_H312R-F     | 5'-CTA CAC CCT <u>CAG</u> AGT GCC GGT CCG CGA CTA CGT CCG-3'             |
| PriB_H312S-F     | 5'-CTA CAC CCT <u>CTC</u> AGT GCC GGT CCG CGA CTA CGT CCG GCA C-3'       |
| PriB_H312T-F     | 5'-CTA CAC CCT <u>CAC</u> TGT GCC GGT CCG CGA CTA CGT CCG GCA C-3'       |
| PriB_H312V-F     | 5'-CTA CAC CCT <u>CGT</u> AGT GCC GGT CCG CGA CTA CGT CCG GCA CG-3'      |
| PriB_H312W-F     | 5'-CTA CAC CCT <u>CTG</u> GGT GCC GGT CCG CGA CTA CGT CCG G-3'           |
| PriB_H312Y-F     | 5'-CTA CAC CCT <u>CTA</u> TGT GCC GGT CCG CGA C-3'                       |
| PriB_H312X-R     | 5'-CCG CTG GGC CGC CCG GTC-3'                                            |
| PriB_Y364H-F     | 5'-CCT GAT CGC CCA TCT GGC ACT-3'                                        |
| PriB_Y364H-R     | 5'-CCC ACC CCG TCA CTC AGC-3'                                            |
| IptA_H294Y-F     | 5'-TTT TAC ACT <u>TTA</u> TAT GCC CGT ACG GTC TTA C-3'                   |
| IptA_H294Y-R     | 5'-CCA CTG GGA CGC CCA GTA-3'                                            |
| 6DMATSsa_H284Y-F | 5'-CTT TAC CTT <u>GTA</u> TAT TCC GGT TCG TGA TTA TG-3'                  |
| 6DMATSsa_H284Y-R | 5'-CCG CTC GGA CGA CCA CTG-3'                                            |
| 6DMATSsv_H287Y-F | 5'-TTA TAC GCT <u>GTA</u> TGT TCC CGT AAG-3'                             |
| 6DMATSsv_H287Y-R | 5'-CCA GAA GGA AGG CCA GTT-3'                                            |
| 6DMATSmO_Y277H-F | 5'-TTA CTC TAT <u>CCA</u> TGT TCC GAT CCG TTC TTA CGT TAC C-3'           |
| 6DMATSmO_Y277H-R | 5'-CCA ACC GGA <u>CGG</u> TCC GCA-3'                                     |
| 6DMATSmO_H329Y-F | 5'-TCT GAT CGC <u>GTA</u> TGT TTC TCT GCG-3'                             |
| 6DMATSmO_H329Y-R | 5'-CCA ACA CCG TCA CGC AGC-3'                                            |
| T7               | 5'-TAA TAC GAC TCA CTA TAG GG-3'                                         |
| T7 Terminator    | 5'-GCT AGT TAT TGC TCA GCG G-3'                                          |

**Table S2.** Summary of molecular formula, calculated and observed high-resolution mass spectrometry data of prenylated tryptophans generated in study.

| Compound  | Molecular Formula                                             | Ionization           | Calculated Mass<br>( <i>m/z</i> ) | Observed Mass<br>( <i>m/z</i> ) |
|-----------|---------------------------------------------------------------|----------------------|-----------------------------------|---------------------------------|
| <b>3b</b> | C <sub>16</sub> H <sub>21</sub> N <sub>2</sub> O <sub>2</sub> | [M + H] <sup>+</sup> | 273.1598                          | 273.1589                        |
| <b>3c</b> | C <sub>16</sub> H <sub>21</sub> N <sub>2</sub> O <sub>2</sub> | [M + H] <sup>+</sup> | 273.1598                          | 273.1589                        |
| <b>3d</b> | C <sub>16</sub> H <sub>21</sub> N <sub>2</sub> O <sub>2</sub> | [M + H] <sup>+</sup> | 273.1598                          | 273.1591                        |

**Table S3.** <sup>1</sup>H (400 MHz) and <sup>13</sup>C (100 MHz) NMR spectroscopic data of (2*S*)-3a-(3-methylbut-2-en-1-yl)-1,2,3,3a,8,8a-hexahydropyrrolo[2,3-*b*]indole-2-carboxylic acid **3b** (*d*<sub>6</sub>-DMSO).

| Residue | Position              | 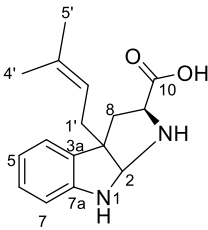<br>(C3) <b>3b<sup>a</sup></b> |                                        |
|---------|-----------------------|------------------------------------------------------------------------------------------------------------------|----------------------------------------|
|         |                       | $\delta_c$ , type                                                                                                | $\delta_H$ , mult (J in Hz)            |
| L-Trp   | 1                     |                                                                                                                  | 6.34, s                                |
|         | 2                     | 82.3, CH                                                                                                         | 4.76, s                                |
|         | 3                     | 56.9, C                                                                                                          |                                        |
|         | 3a                    | 133.2, C                                                                                                         |                                        |
|         | 4                     | 123.2, CH                                                                                                        | 6.99, d (7.3)                          |
|         | 5                     | 117.7, CH                                                                                                        | 6.58, t (7.6)                          |
|         | 6                     | 127.6, CH                                                                                                        | 6.93, t (7.6)                          |
|         | 7                     | 124.2, CH                                                                                                        | 6.48, d (7.7)                          |
|         | 7a                    | 148.8, C                                                                                                         |                                        |
|         | 8                     | 40.4, CH <sub>2</sub>                                                                                            | 2.36 – 2.30, m<br>2.21, dd (12.9, 5.6) |
| DMA     | 9                     | 59.2, CH                                                                                                         | 3.71, dd (8.5, 5.7)                    |
|         | C=O                   | 172.2, C                                                                                                         |                                        |
|         | 1'                    | 36.0, CH <sub>2</sub>                                                                                            | 2.28, m                                |
|         | 2'                    | 119.7, CH                                                                                                        | 5.04, t (7.2)                          |
|         | 3'                    | 133.6, C                                                                                                         |                                        |
|         | 4'                    | 17.8, CH <sub>3</sub>                                                                                            | 1.51, s                                |
| 5'      | 25.7, CH <sub>3</sub> | 1.63, s                                                                                                          |                                        |

Assignments supported by 2D COSY, HSQC, HMBC experiments and by comparison with related compounds from literatures. <sup>a</sup>see Supporting NMR Spectral Data. DMA, dimethylallyl.

**Table S4.**  $^1\text{H}$  (400 MHz) and  $^{13}\text{C}$  (100 MHz) NMR spectroscopic data of (*S*)-2-amino-3-(7-(3-methylbut-2-en-1-yl)-1*H*-indol-3-yl)propanoic acid **3c** and 1-(3-methylbut-2-en-1-yl)-*L*-tryptophan **3d** ( $d_6$ -DMSO).

| Residue | Positn | 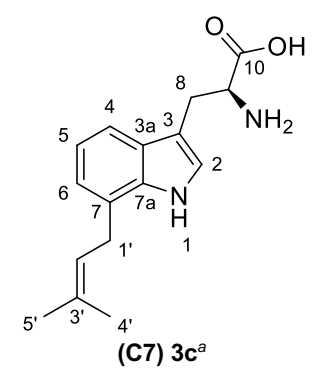<br>(C7) <b>3c<sup>a</sup></b> |                                      | <br>(N1) <b>3d<sup>a</sup></b> |                                      |
|---------|--------|-----------------------------------------------------------------------------------------------------------------|--------------------------------------|------------------------------------------------------------------------------------------------------------------|--------------------------------------|
|         |        | $\delta_{\text{C}}$ , type                                                                                      | $\delta_{\text{H}}$ , mult (J in Hz) | $\delta_{\text{C}}$ , type                                                                                       | $\delta_{\text{H}}$ , mult (J in Hz) |
| L-Trp   | 1      |                                                                                                                 | 10.80, s                             |                                                                                                                  |                                      |
|         | 2      | 123.9, CH                                                                                                       | 7.18, s                              | 127.0, CH                                                                                                        | 7.17, s                              |
|         | 3      | 109.7, C                                                                                                        |                                      | 109.2, C                                                                                                         |                                      |
|         | 3a     | 127.1, C                                                                                                        |                                      | 127.7, C                                                                                                         |                                      |
|         | 4      | 116.0, CH                                                                                                       | 7.38, d (7.7)                        | 118.7, CH                                                                                                        | 7.57, d (7.9)                        |
|         | 5      | 118.6, CH                                                                                                       | 6.91, t (7.5)                        | 118.4, CH                                                                                                        | 7.01, t (7.4)                        |
|         | 6      | 120.0, CH                                                                                                       | 6.84, d (6.9)                        | 121.0, CH                                                                                                        | 7.11, t (7.6)                        |
|         | 7      | 124.2, C                                                                                                        |                                      | 109.7, CH                                                                                                        | 7.35, d (8.2)                        |
|         | 7a     | 135.0, C                                                                                                        |                                      | 135.9, C                                                                                                         |                                      |
|         | 8      | 27.1, CH <sub>2</sub>                                                                                           | 2.93, dd (15.1, 9.1)                 | 27.0, CH <sub>2</sub>                                                                                            | 2.93, dd (15.1, 8.8)                 |
| DMA     | 9      | 54.4, CH                                                                                                        | 3.31 – 3.26, m                       | 54.7, CH                                                                                                         | 3.27, bm                             |
|         | C=O    | 169.8, C                                                                                                        | 3.51, m                              | 169.6, C                                                                                                         | 3.49, bm                             |
|         | 1'     | 29.0, CH <sub>2</sub>                                                                                           | 3.51, d (7.2)                        | 43.4, CH <sub>2</sub>                                                                                            | 4.69, d (6.7)                        |
|         | 2'     | 122.2, CH                                                                                                       | 5.42, t (7.3)                        | 120.6, CH                                                                                                        | 5.32, t (6.8)                        |
|         | 3'     | 131.9, C                                                                                                        |                                      | 134.9, C                                                                                                         |                                      |
|         | 4'     | 17.7, CH <sub>3</sub>                                                                                           | 1.71, s                              | 17.8, CH <sub>3</sub>                                                                                            | 1.81, s                              |
|         | 5'     | 25.5, CH <sub>3</sub>                                                                                           | 1.71, s                              | 25.3, CH <sub>3</sub>                                                                                            | 1.71, s                              |

Assignments supported by 2D COSY, HSQC, HMBC experiments and by comparison with related compounds from literatures. <sup>a</sup>see Supporting NMR Spectral Data. DMA, dimethylallyl.

**Table S5.** Residues that align with PriB His312 (position 1) and Tyr364 (position 2) present in selected indole prenyltransferases.

| <b>Enzyme</b>            | <b>Position 1</b> | <b>Position 2</b> |
|--------------------------|-------------------|-------------------|
| PriB <sup>[1]</sup>      | His312            | Tyr364            |
| DMATS1 <sup>[2]</sup>    | Tyr334            | Tyr389            |
| AmbP3 <sup>[3]</sup>     | Tyr168            | Tyr225            |
| FtmPT1 <sup>[4]</sup>    | Tyr382            | Tyr435            |
| CdpNPT <sup>[5]</sup>    | Tyr366            | Trp319            |
| AnaPT <sup>[6]</sup>     | Tyr357            | Trp410            |
| FgaPT2 <sup>[7]</sup>    | Tyr345            | Tyr398            |
| 5DMATSsc <sup>[8]</sup>  | Tyr274            | Tyr326            |
| MpnD <sup>[9]</sup>      | Tyr300            | Phe350            |
| IptA <sup>[10]</sup>     | His294            | Tyr346            |
| 6DMATSsa <sup>[11]</sup> | His284            | Tyr336            |
| 6DMATSsv <sup>[11]</sup> | His287            | Tyr339            |
| 6DMATSmo <sup>[8]</sup>  | Tyr277            | His329            |
| AtmD <sup>[12]</sup>     | Tyr346            | His397            |
| JanD <sup>[13]</sup>     | Tyr350            | His402            |
| PaxD <sup>[14]</sup>     | Tyr349            | His401            |

#### **IV-Supporting References**

- [1] S. I. Elshahawi, H. Cao, K. A. Shaaban, L. V. Ponomareva, T. Subramanian, M. L. Farman, H. P. Spielmann, G. N. Phillips, J. S. Thorson, S. Singh, *Nat. Chem. Biol.* **2017**, *13*, 366–368.
- [2] S. A. Eaton, T. A. Ronnebaum, B. W. Roose, D. W. Christianson, *Biochemistry* **2022**, *61*, 2025–2035.
- [3] C. P. Wong, T. Awakawa, Y. Nakashima, T. Mori, Q. Zhu, X. Liu, I. Abe, *Angew. Chem.* **2018**, *57*, 560–563.
- [4] M. Jost, G. Zocher, S. Tarcz, M. Matuschek, X. Xie, S.-M. Li, T. Stehle, *J. Am. Chem. Soc.* **2010**, *132*, 17849–17858.
- [5] J. Chen, H. Morita, R. Kato, H. Noguchi, S. Sugio, I. Abe, *Acta Crystallograph. Sect. F Struct. Biol. Cryst. Commun.* **2012**, *68*, 355–358.
- [6] X. Yu, G. Zocher, X. Xie, M. Liebhold, S. Schütz, T. Stehle, S.-M. Li, *Chem. Biol.* **2013**, *20*, 1492–1501.
- [7] U. Metzger, C. Schall, G. Zocher, I. Unsöld, E. Stec, S.-M. Li, L. Heide, T. Stehle, *Proc. Natl. Acad. Sci. U. S. A.* **2009**, *106*, 14309–14314.
- [8] E. Ostertag, L. Zheng, K. Broger, T. Stehle, S.-M. Li, G. Zocher, *J. Mol. Biol.* **2021**, *433*, 166726.
- [9] T. Mori, L. Zhang, T. Awakawa, S. Hoshino, M. Okada, H. Morita, I. Abe, *Nat. Commun.* **2016**, *7*, 10849.
- [10] H. Suemune, D. Nishimura, K. Mizutani, Y. Sato, T. Hino, H. Takagi, Y. Shiozaki-Sato, S. Takahashi, S. Nagano, *Biochem. Biophys. Res. Commun.* **2022**, *593*, 144–150.
- [11] J. Winkelblech, S.-M. Li, *Chembiochem* **2014**, *15*, 1030–1039.
- [12] C. Liu, A. Minami, M. Noike, H. Toshima, H. Oikawa, T. Dairi, *Appl. Environ. Microbiol.* **2013**, *79*, 7298–7304.
- [13] M. J. Nicholson, C. J. Eaton, C. Stärkel, B. A. Tapper, M. P. Cox, B. Scott, *Toxins* **2015**, *7*, 2701–2722.
- [14] C. Liu, M. Noike, A. Minami, H. Oikawa, T. Dairi, *Appl. Microbiol. Biotechnol.* **2014**, *98*, 199–206.

## V-Supporting Mass and NMR Spectra

### Analysis Info

|               |                                                            |                  |                     |
|---------------|------------------------------------------------------------|------------------|---------------------|
| Analysis Name | D:\Data\Eishahawi\NMupparapu\LC MS Data\DMAPP_RB2_01_148.d | Acquisition Date | 4/4/2019 1:33:07 PM |
| Method        | AutoMsMs -ve.m                                             | Operator         | Demo User           |
| Sample Name   | DMAPP                                                      | Instrument       | impact II           |
| Comment       |                                                            |                  |                     |

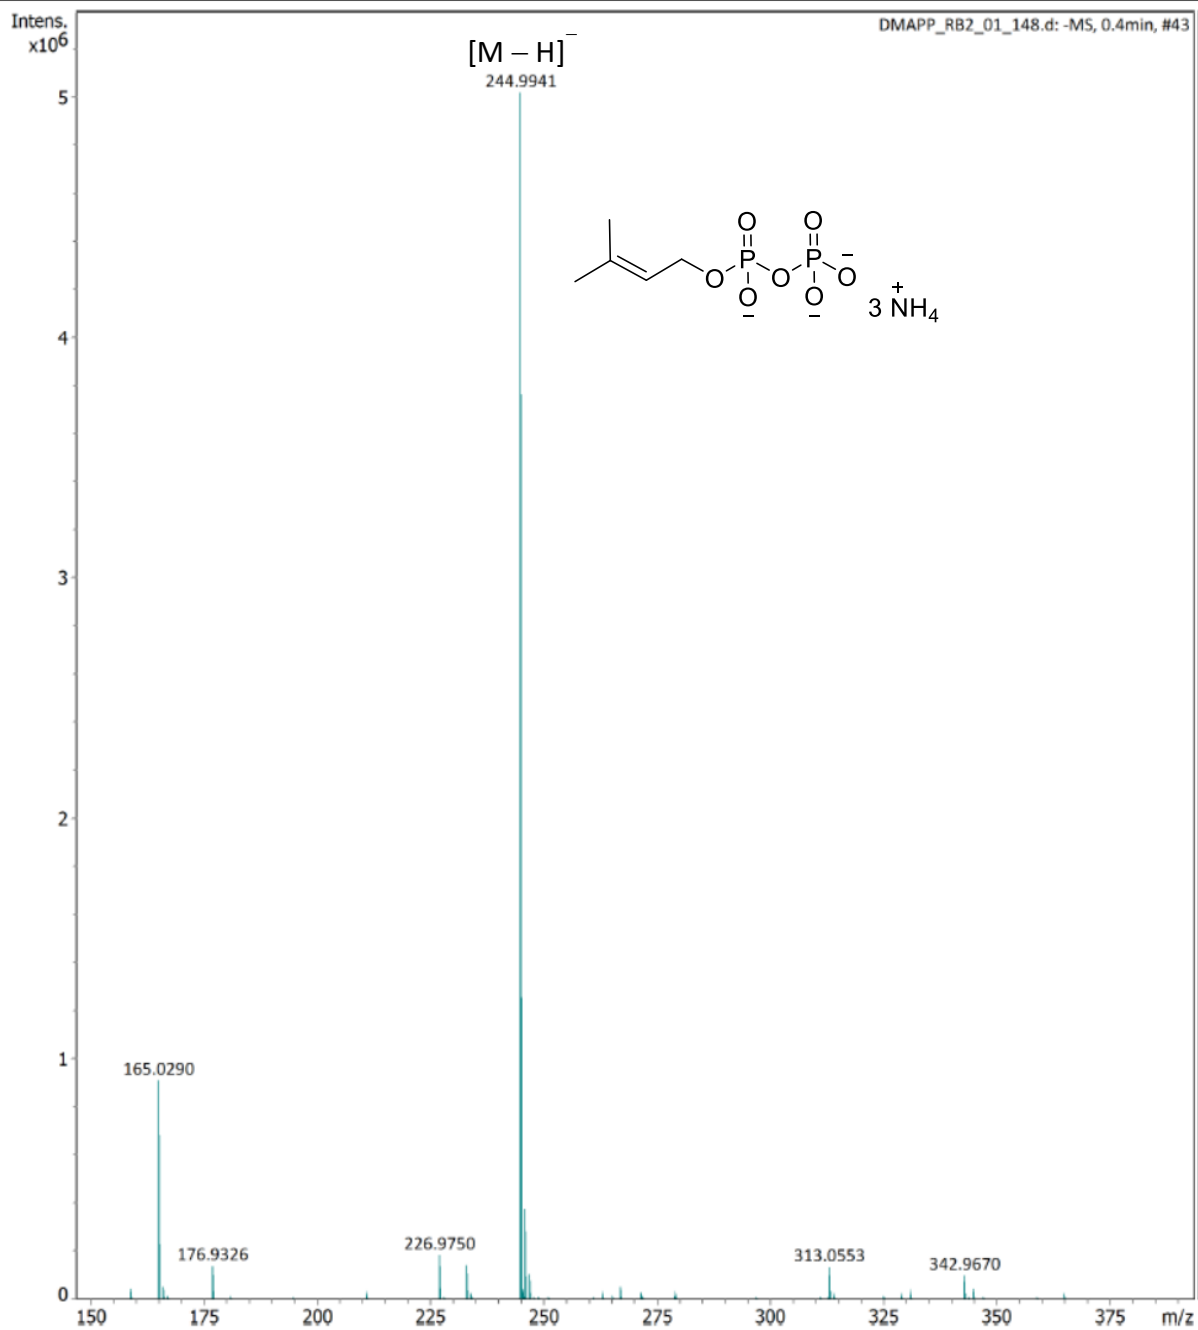

LC-HR-ESI-MS data of dimethylallyl diphosphate **2**.

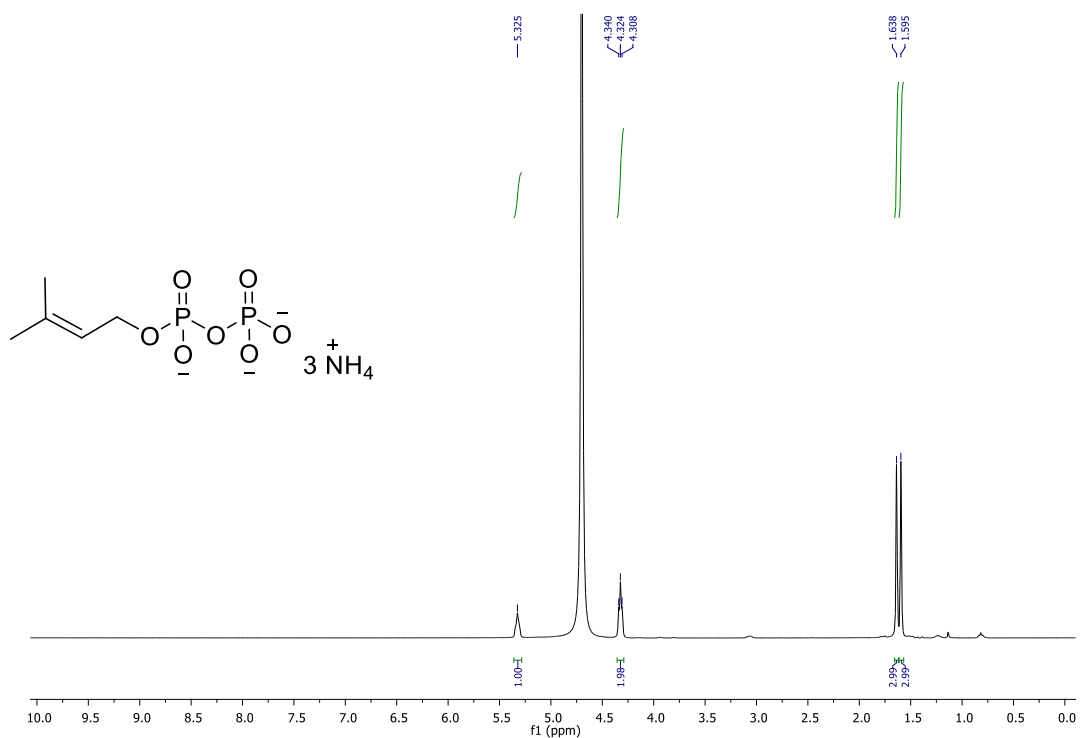

<sup>1</sup>H NMR (D<sub>2</sub>O, 400 MHz) of dimethylallyl diphosphate **2**.

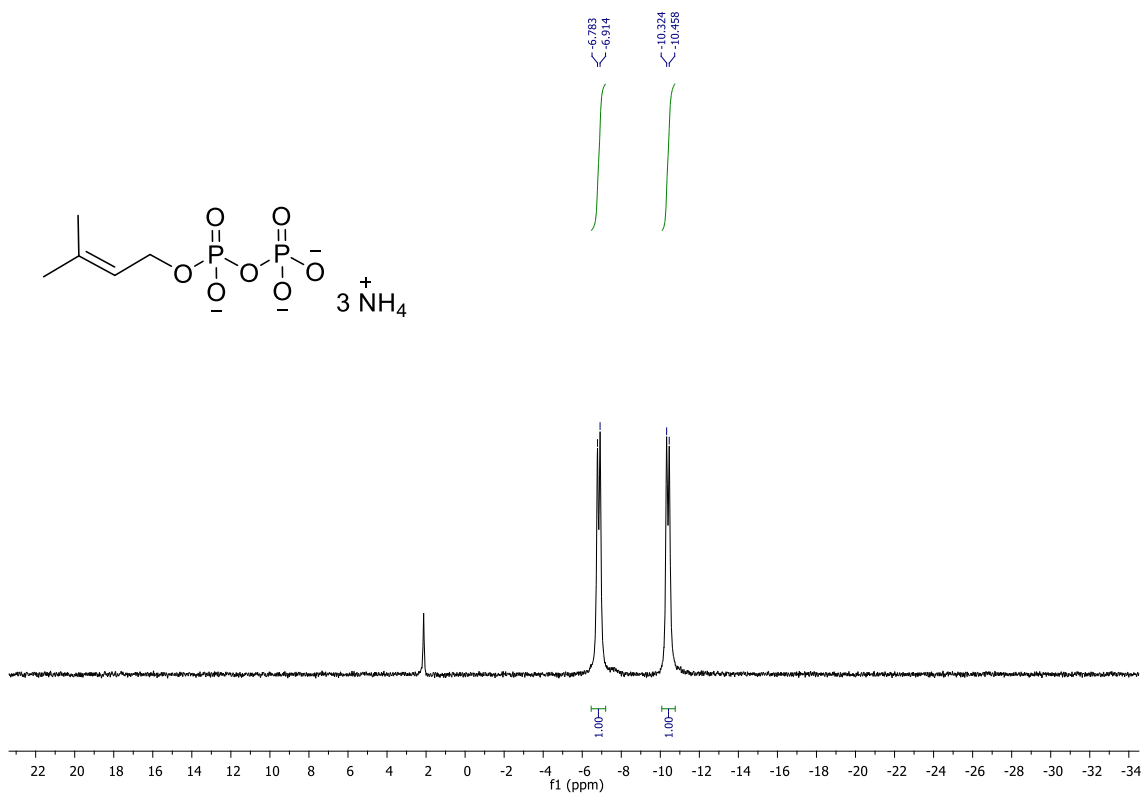

<sup>31</sup>P NMR (D<sub>2</sub>O, 164 MHz) of dimethylallyl diphosphate **2**.



**Analysis Info**

Analysis Name D:\Data\Eishahawi\NMupparapu\LC MS Data\NM-III-82A-2B-2\_RE1\_1\_4635.d Acquisition Date 2/16/2022 1:12:37 PM  
Method LC\_15min\_MsMs\_M2.m Operator Demo User  
Sample Name NM-III-82A-2B-2 Instrument impact II  
Comment

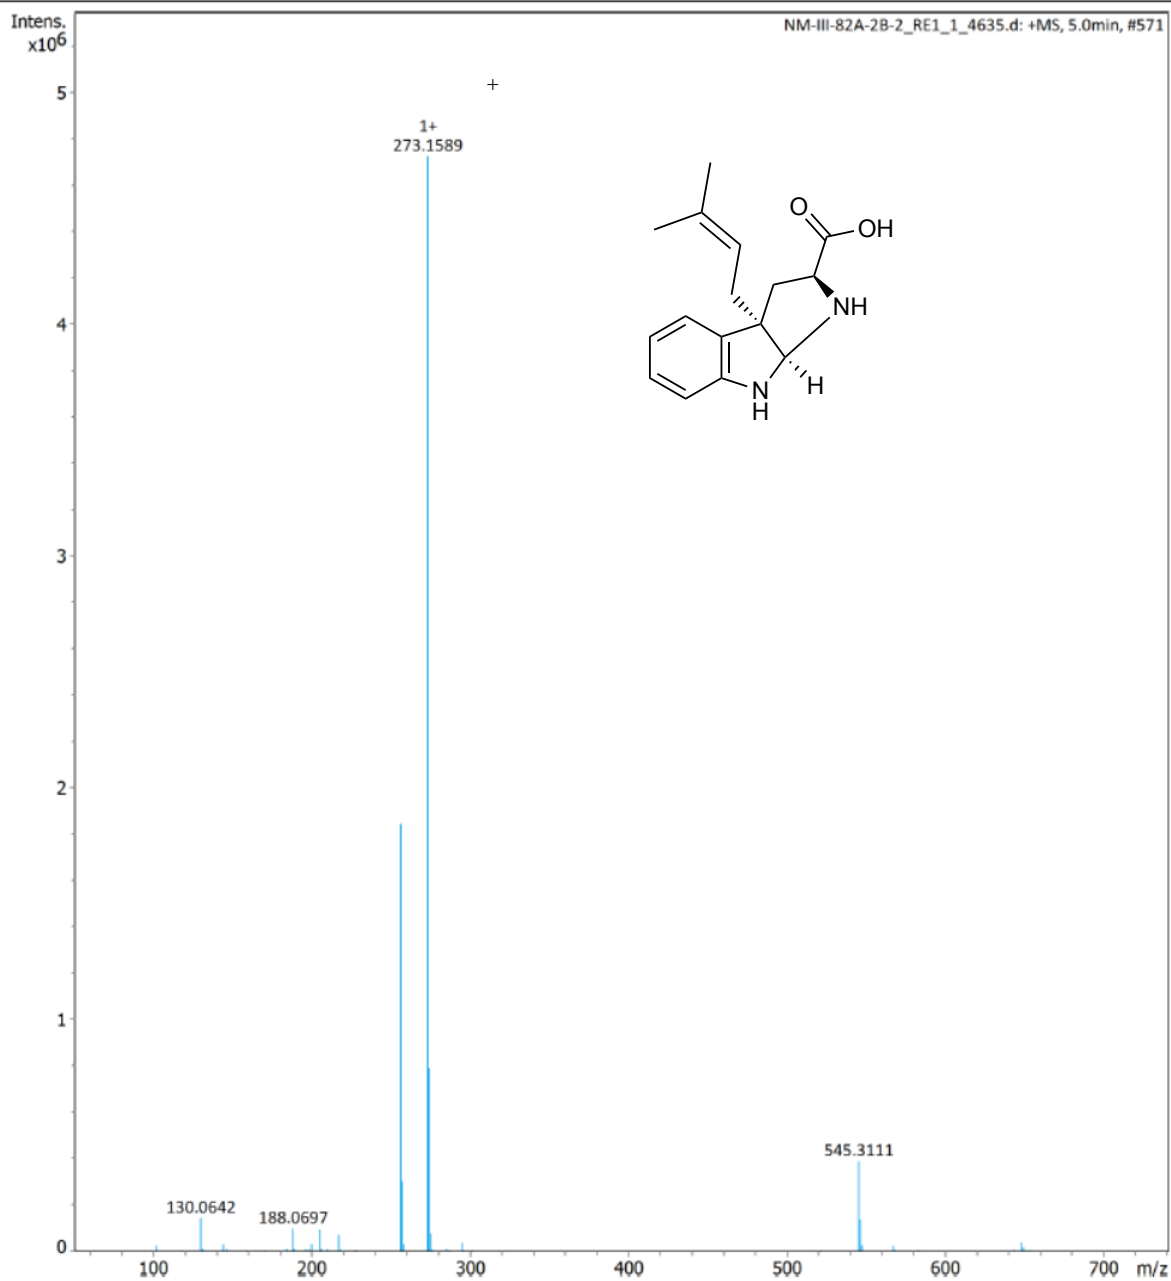

Bruker Compass DataAnalysis 5.3 printed: 2/16/2022 6:14:29 PM by: demo Page 1 of 1

LC-HR-ESI-MS of (2S)-3a-(3-methylbut-2-en-1-yl)-1,2,3,3a,8,8a-hexahydropyrrolo[2,3-b]indole-2-carboxylic acid **3b**.

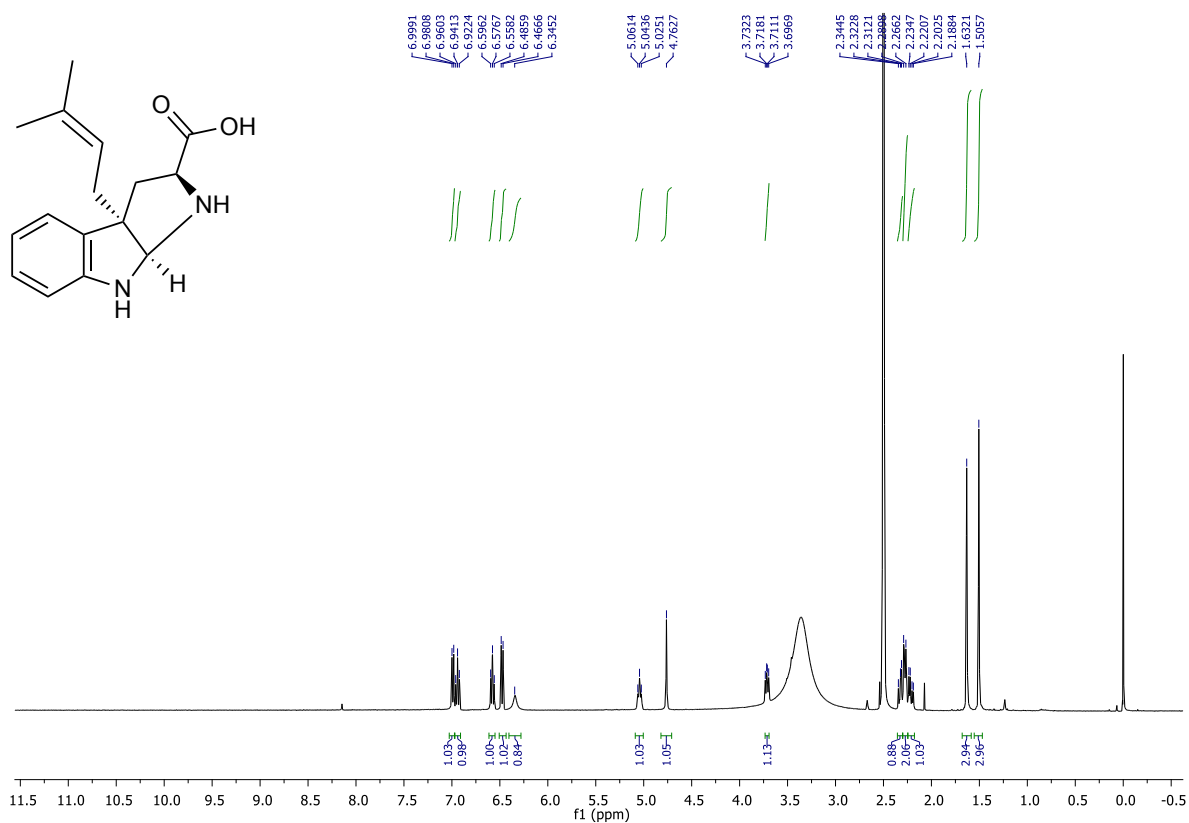

<sup>1</sup>H NMR spectrum (*d*<sub>6</sub>-DMSO, 400 MHz) of (2*S*)-3a-(3-methylbut-2-en-1-yl)-1,2,3,3a,8,8a-hexahydropyrrolo[2,3-*b*]indole-2-carboxylic acid (*d*<sub>6</sub>-DMSO) **3b**.

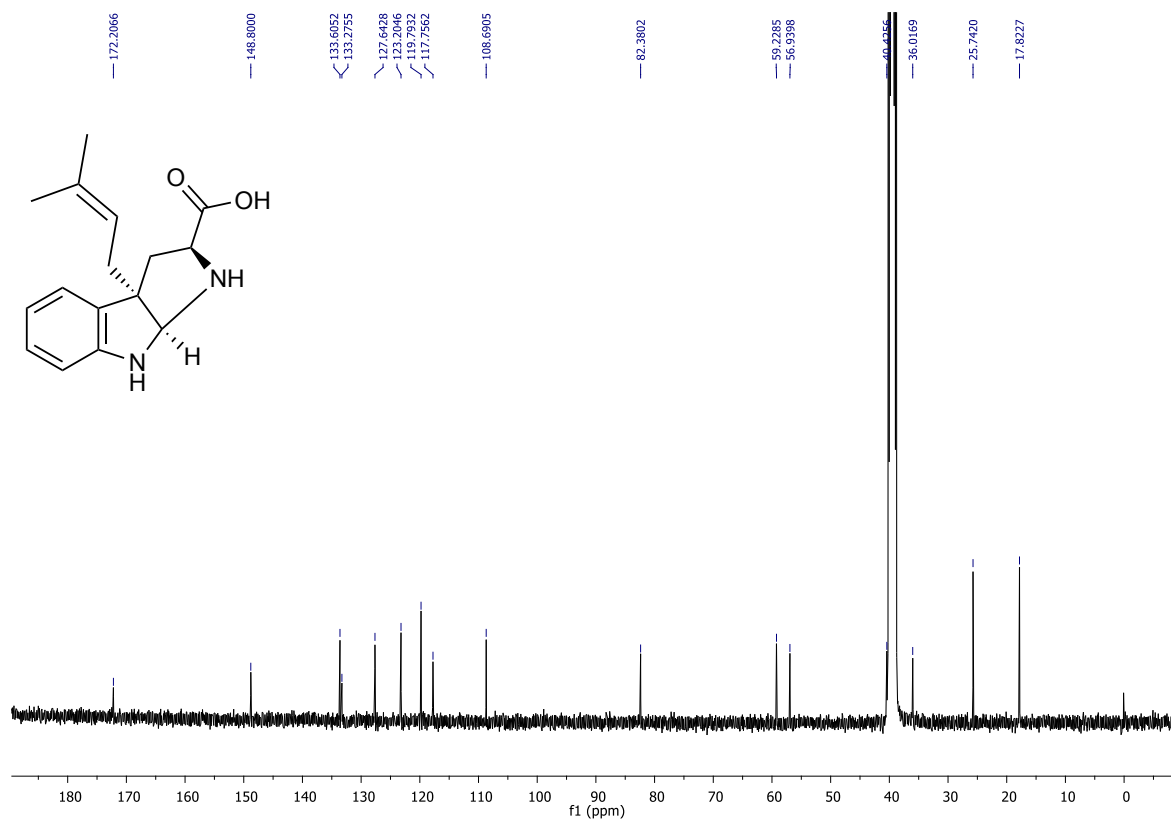

<sup>13</sup>C NMR spectrum (*d*<sub>6</sub>-DMSO, 100 MHz) of (2*S*)-3a-(3-methylbut-2-en-1-yl)-1,2,3,3a,8,8a-hexahydropyrrolo[2,3-*b*]indole-2-carboxylic acid (*d*<sub>6</sub>-DMSO) **3b**.

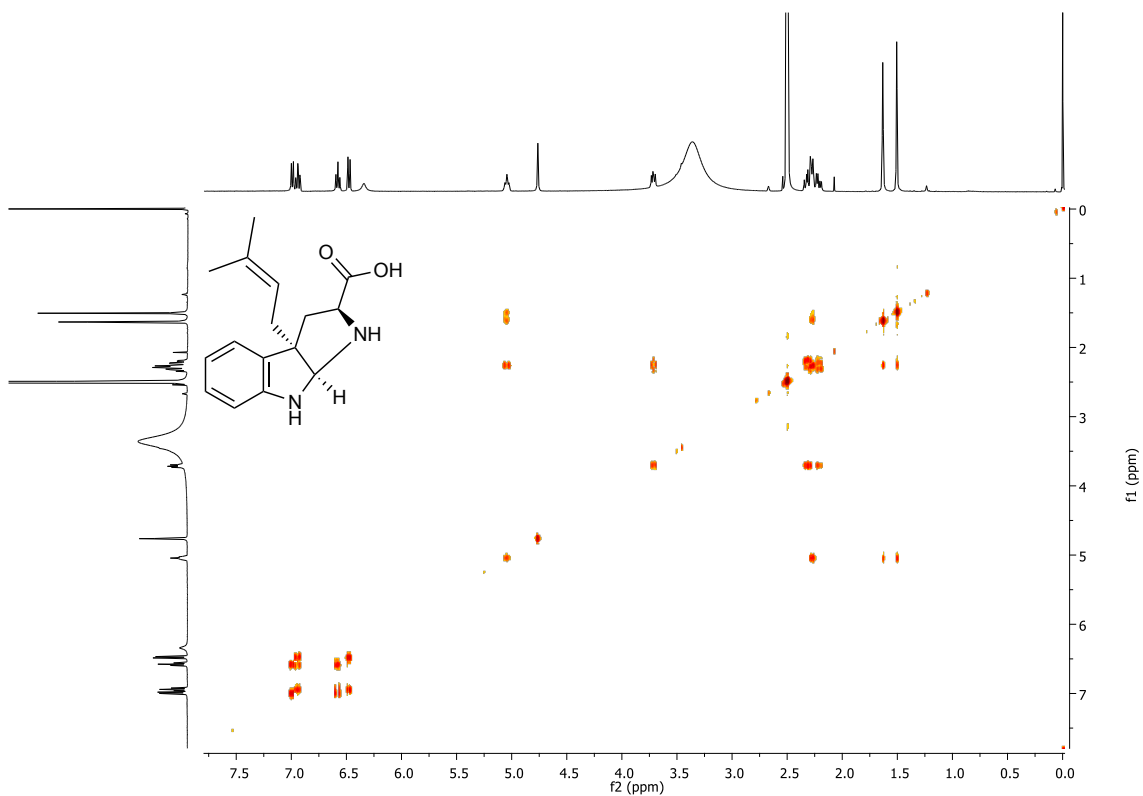

$^1\text{H}$ - $^1\text{H}$  COSY NMR spectrum ( $d_6$ -DMSO, 400 MHz) of (2*S*)-3a-(3-methylbut-2-en-1-yl)-1,2,3,3a,8,8a-hexahydropyrrolo[2,3-b]indole-2-carboxylic acid ( $d_6$ -DMSO) **3b**.

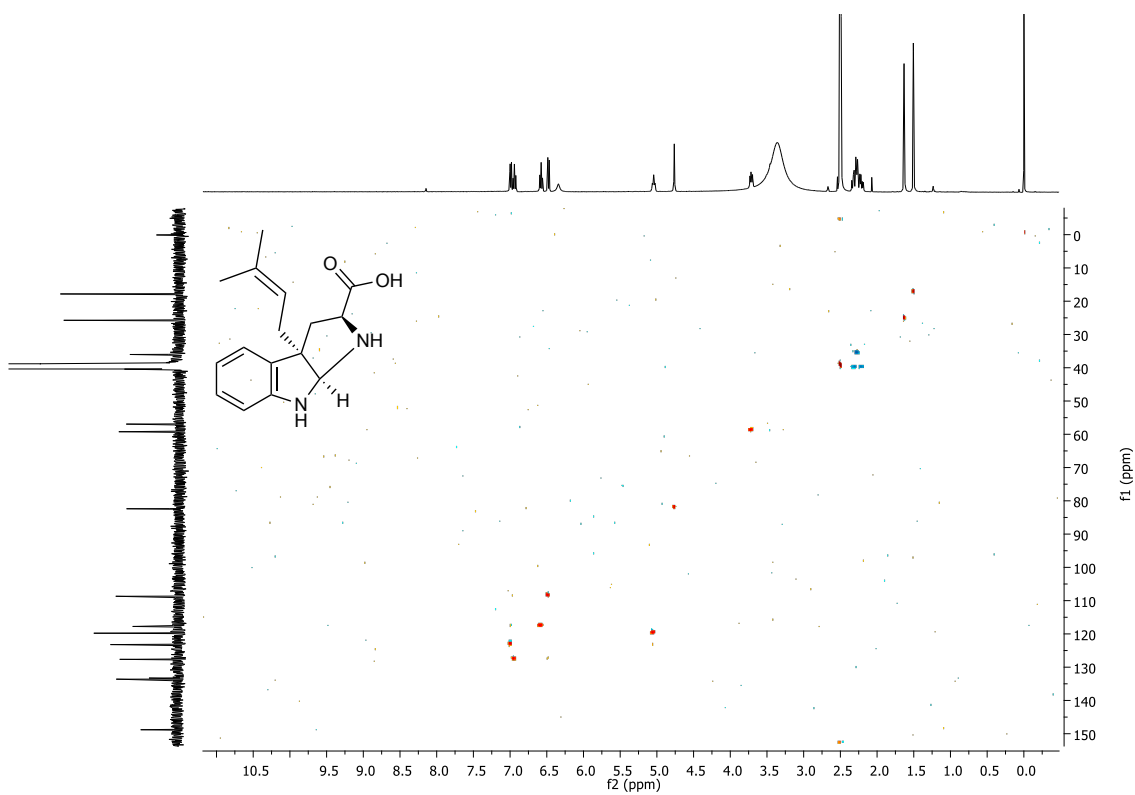

$^1\text{H}$ - $^{13}\text{C}$  HSQC spectrum (DMSO- $d_6$ , 400 MHz) of (2*S*)-3a-(3-methylbut-2-en-1-yl)-1,2,3,3a,8,8a-hexahydropyrrolo[2,3-b]indole-2-carboxylic acid ( $d_6$ -DMSO) **3b**.

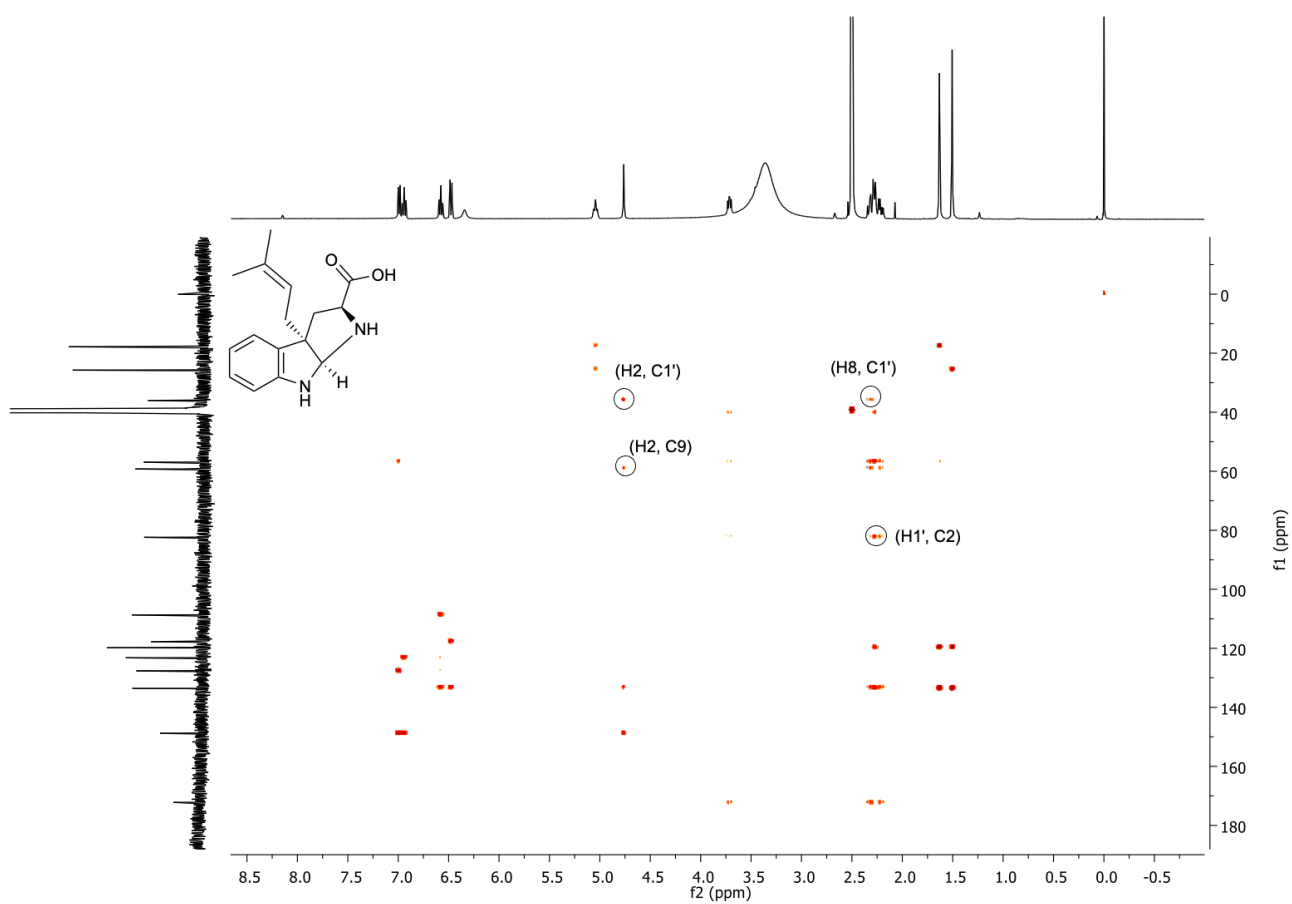

<sup>1</sup>H-<sup>13</sup>C HMBC NMR spectrum (*d*<sub>6</sub>-DMSO, 400 MHz) of (2*S*)-3a-(3-methylbut-2-en-1-yl)-1,2,3,3a,8,8a-hexahydropyrrolo[2,3-*b*]indole-2-carboxylic acid (*d*<sub>6</sub>-DMSO) **3b**. Significant correlations are highlighted.

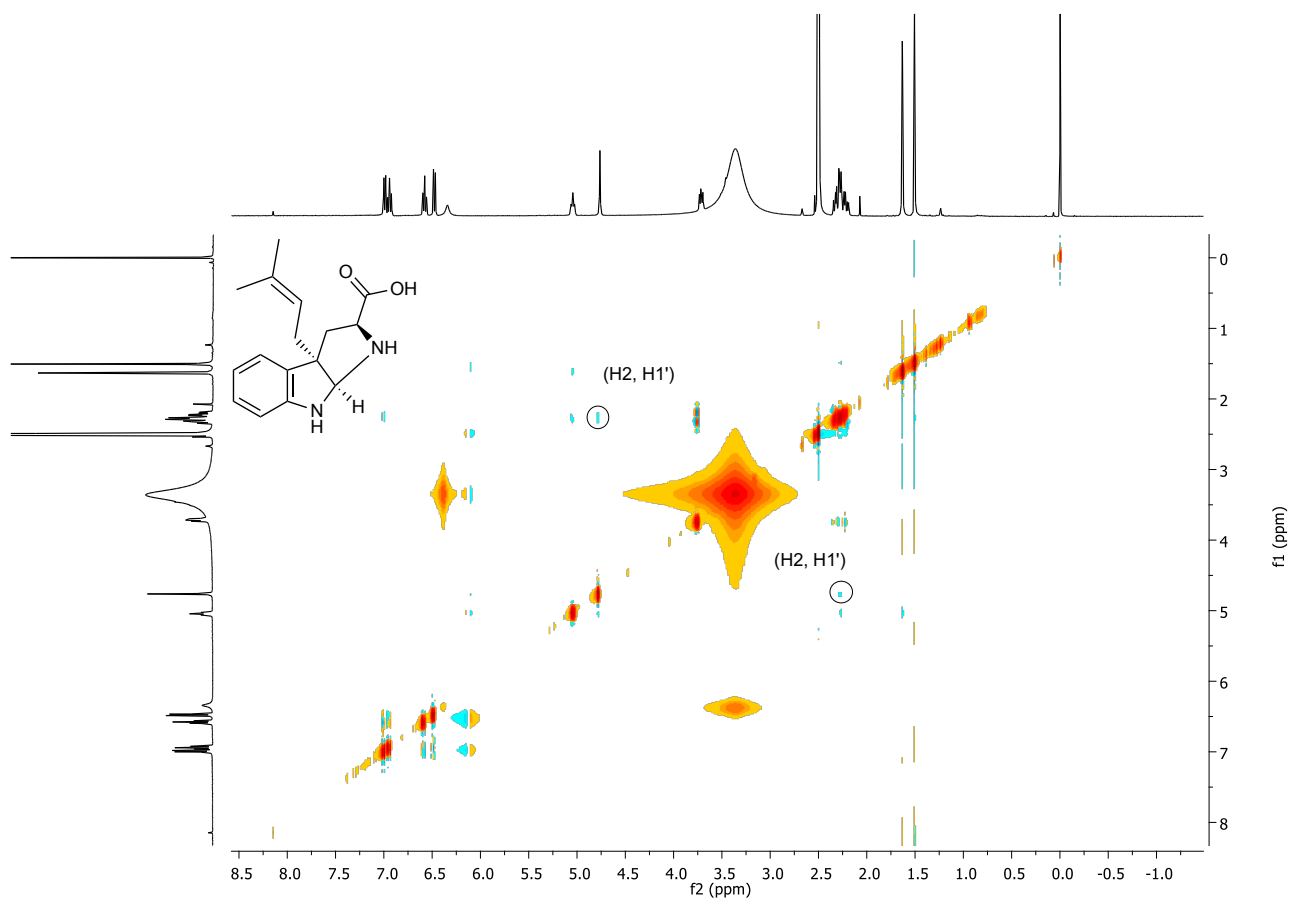

$^1\text{H}$ - $^1\text{H}$  NOESY NMR spectrum ( $d_6$ -DMSO, 400 MHz) of (2*S*)-3a-(3-methylbut-2-en-1-yl)-1,2,3,3a,8,8a-hexahydropyrrolo[2,3-b]indole-2-carboxylic acid ( $d_6$ -DMSO) **3b**. One significant correlation is highlighted.

**Analysis Info**

Analysis Name D:\Data\EIshahawi\NMupparapu\LC MS Data\NM-III-82A-1B-2\_RE2\_1\_4637.d  
Method LC\_15min\_MsMs\_M2.m  
Sample Name NM-III-82A-1B-2  
Comment

Acquisition Date 2/16/2022 3:13:07 PM  
Operator Demo User  
Instrument impact II

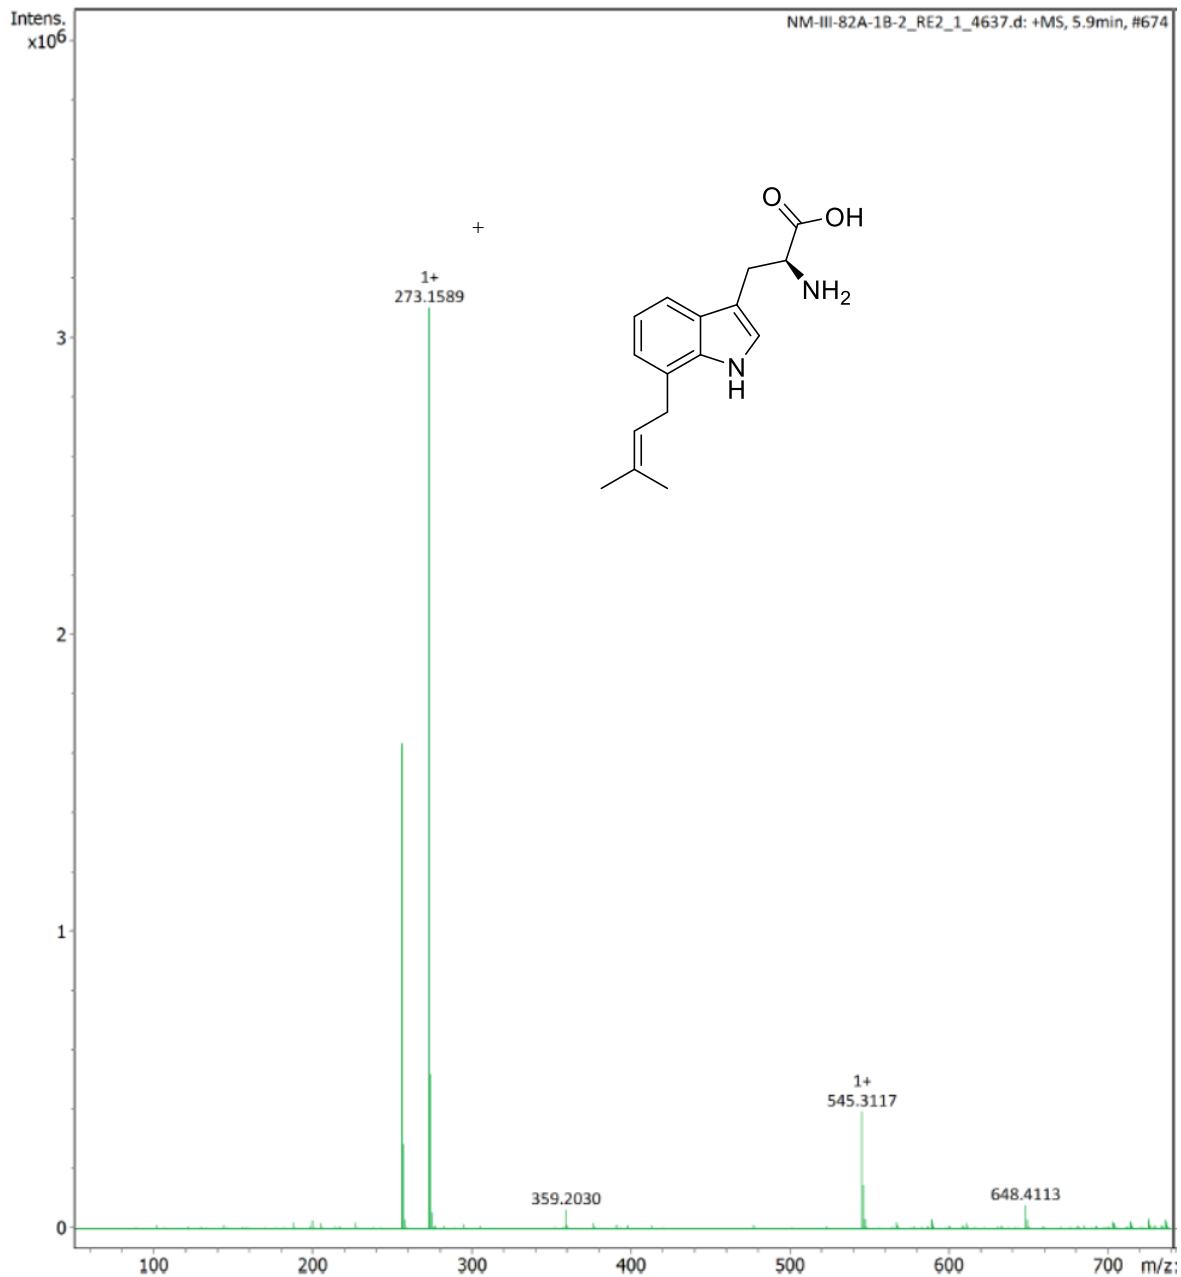

LC-HR-ESI-MS of (S)-2-amino-3-(7-(3-methylbut-2-en-1-yl)-1H-indol-3-yl)propanoic acid **3c**.

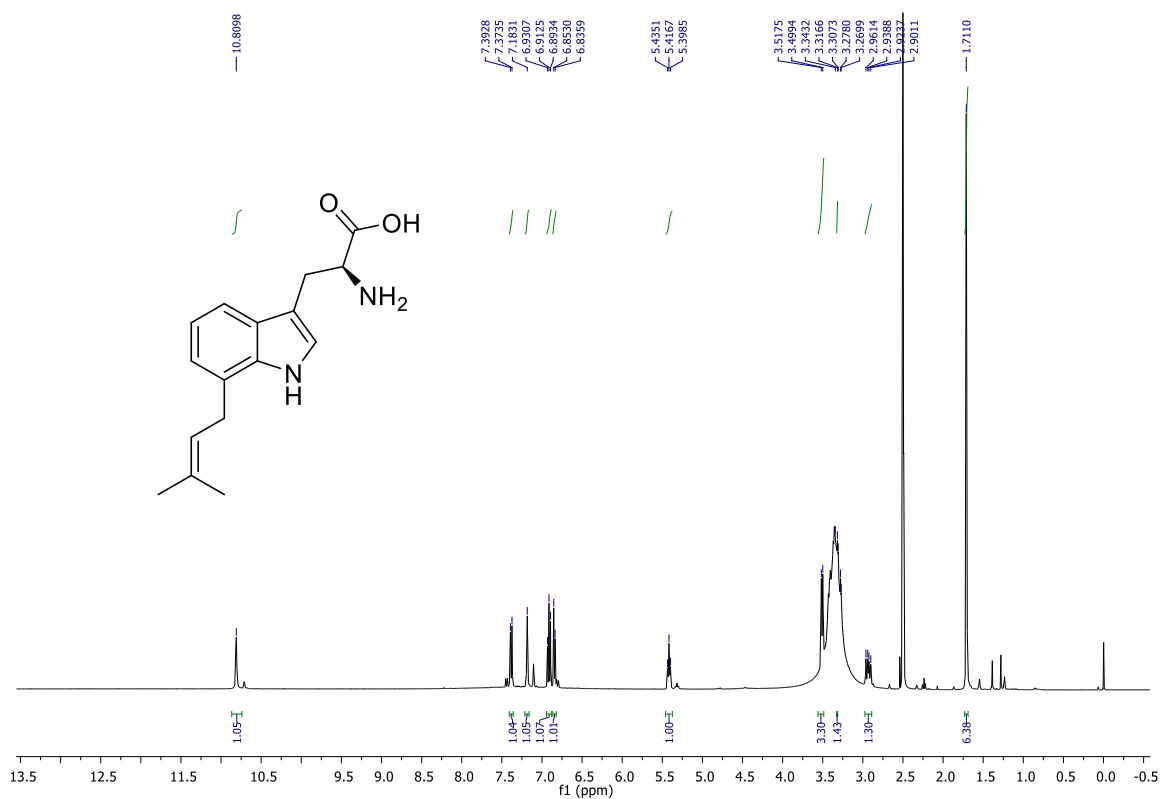

<sup>1</sup>H NMR spectrum (*d*<sub>6</sub>-DMSO, 400 MHz) of (*S*)-2-amino-3-(7-(3-methylbut-2-en-1-yl)-1*H*-indol-3-yl)propanoic acid **3c**.

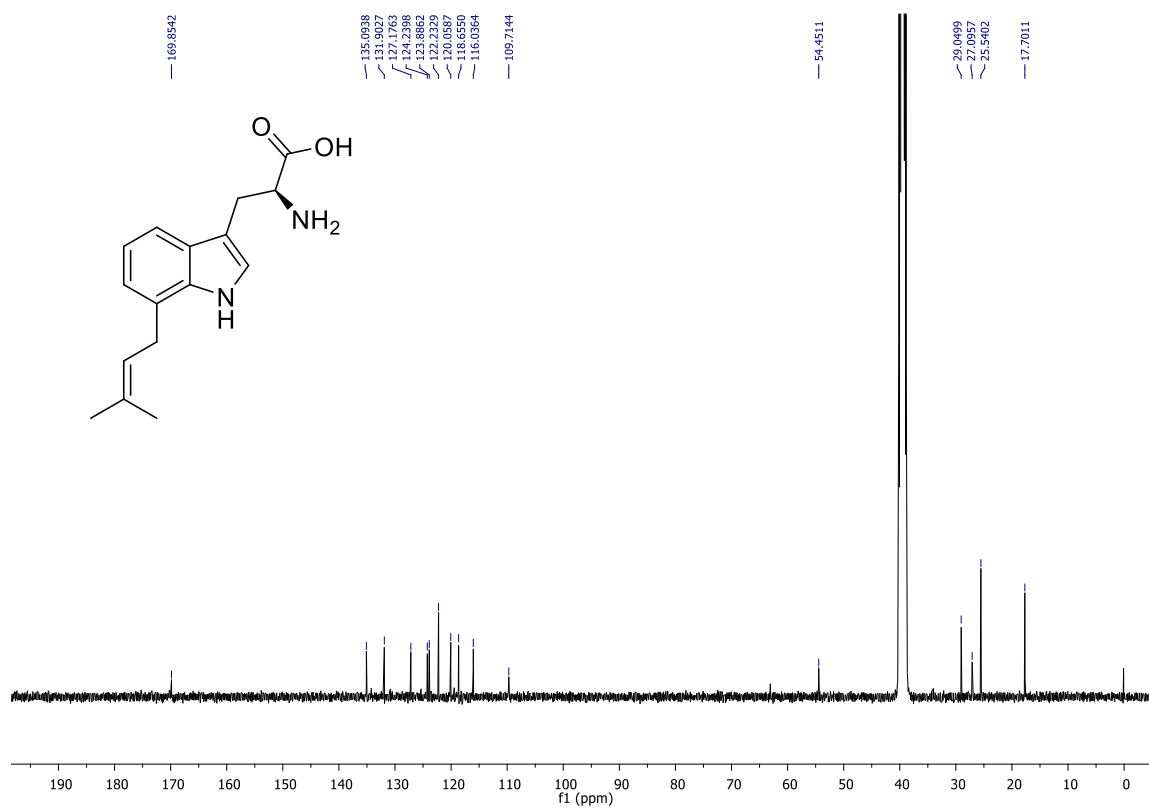

<sup>13</sup>C NMR spectrum (*d*<sub>6</sub>-DMSO, 100 MHz) of (*S*)-2-amino-3-(7-(3-methylbut-2-en-1-yl)-1*H*-indol-3-yl)propanoic acid **3c**.

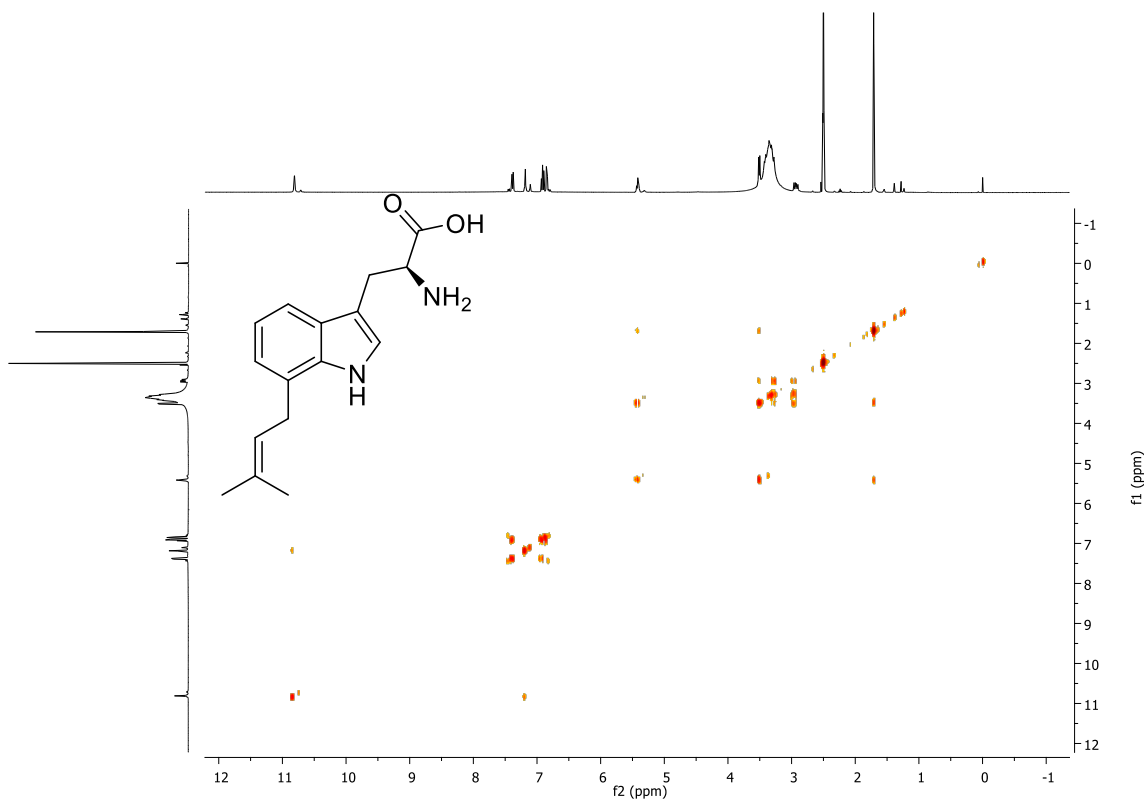

$^1\text{H}$ - $^1\text{H}$  COSY NMR spectrum ( $d_6$ -DMSO, 400 MHz) of (*S*)-2-amino-3-(7-(3-methylbut-2-en-1-yl)-1*H*-indol-3-yl)propanoic acid **3c**.

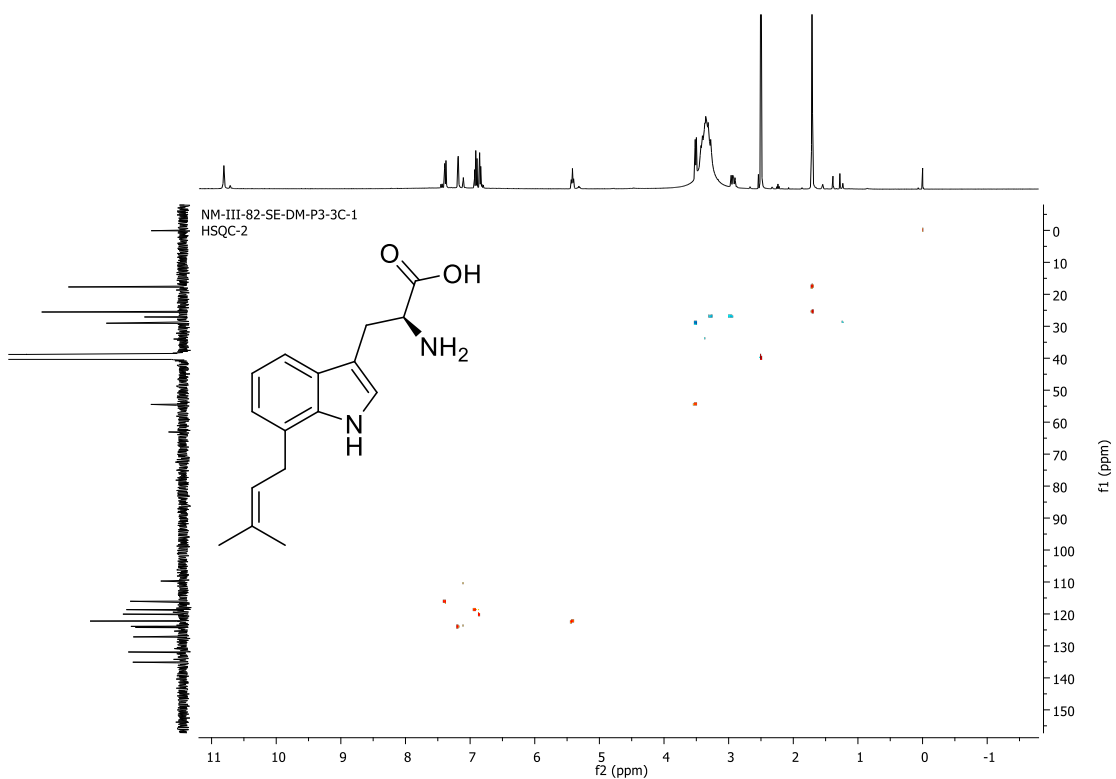

$^1\text{H}$ - $^{13}\text{C}$  HSQC spectrum (DMSO- $d_6$ , 400 MHz) of (*S*)-2-amino-3-(7-(3-methylbut-2-en-1-yl)-1*H*-indol-3-yl)propanoic acid **3c**.



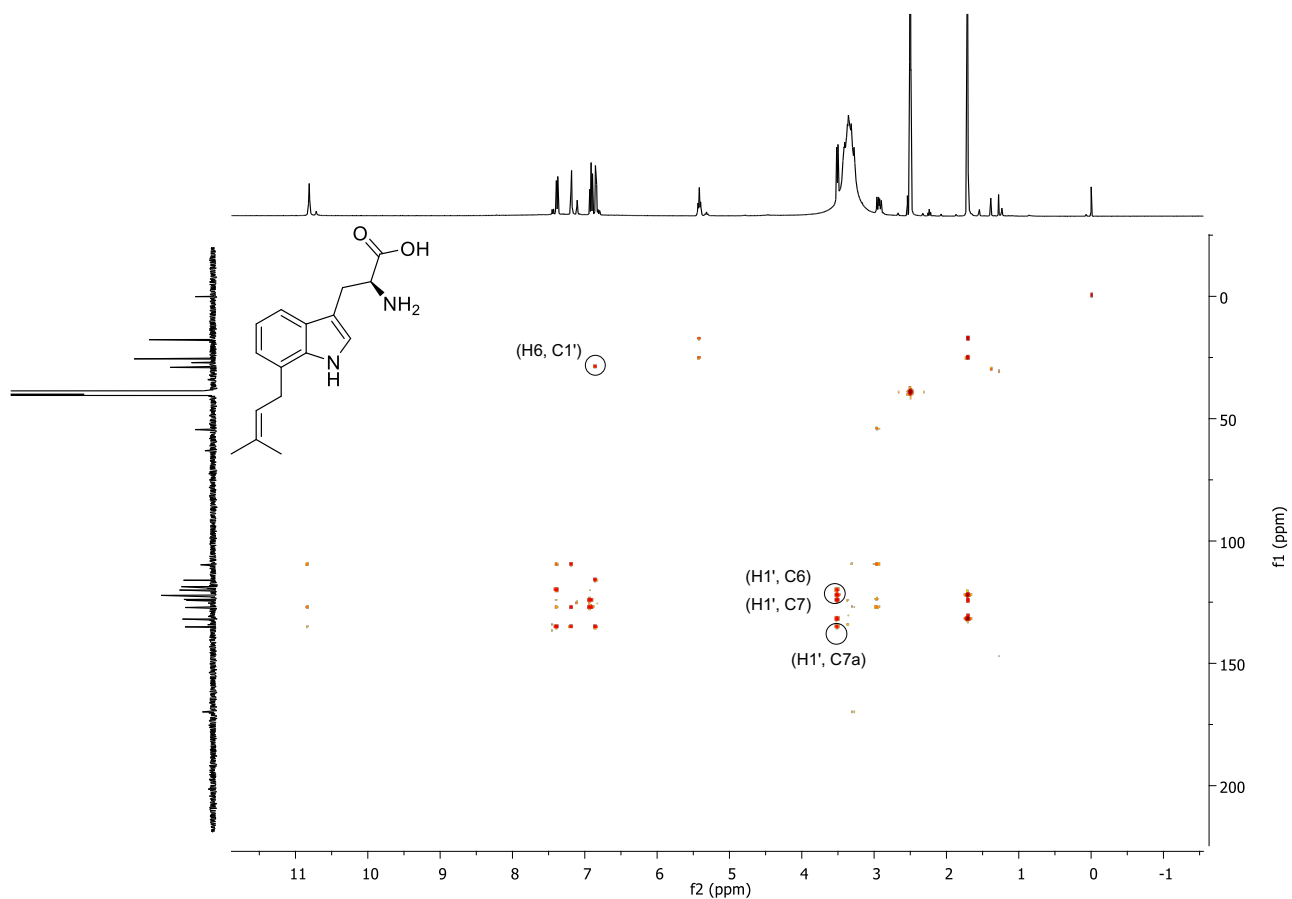

$^1\text{H}$ - $^{13}\text{C}$  HMBC NMR spectrum ( $d_6$ -DMSO, 400 MHz) of (*S*)-2-amino-3-(7-(3-methylbut-2-en-1-yl)-1*H*-indol-3-yl)propanoic acid **3c**. Significant correlations are highlighted.

**Analysis Info**

Analysis Name  
Method  
Sample Name  
Comment

D:\Data\EIshahawi\NMupparapu\LC MS Data\NM-III-82A-3B\_RE3\_1\_4634.d  
LC\_15min\_MsMs\_M2.m  
NM-III-82A-3B

Acquisition Date 2/16/2022 12:55:40 PM  
Operator Demo User  
Instrument impact II

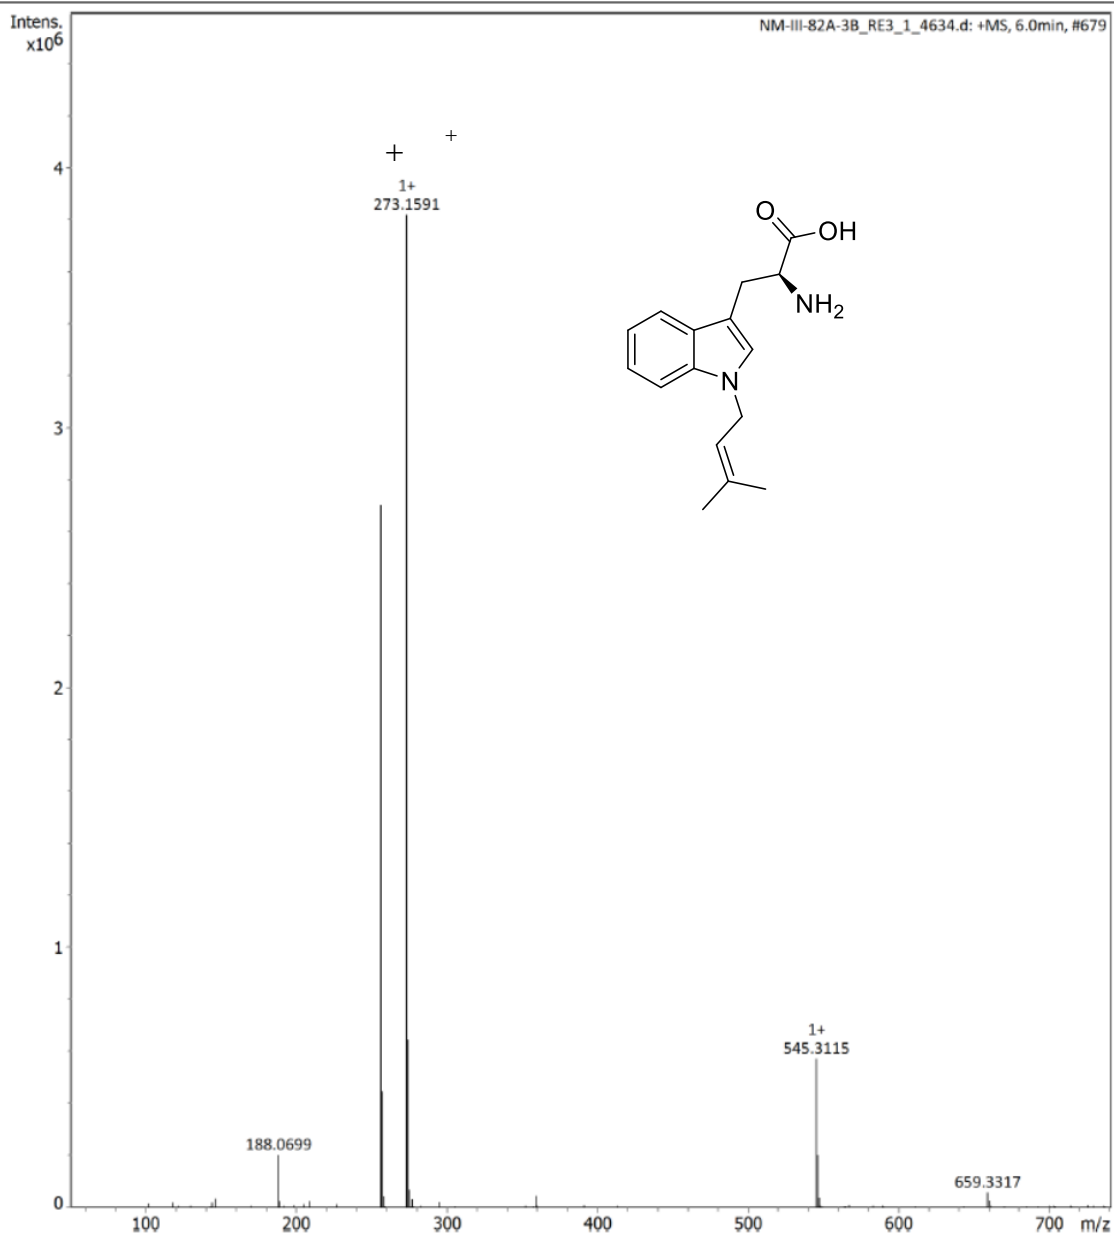

LC-HR-ESI-MS of 1-(3-methylbut-2-en-1-yl)-L-tryptophan **3d**.

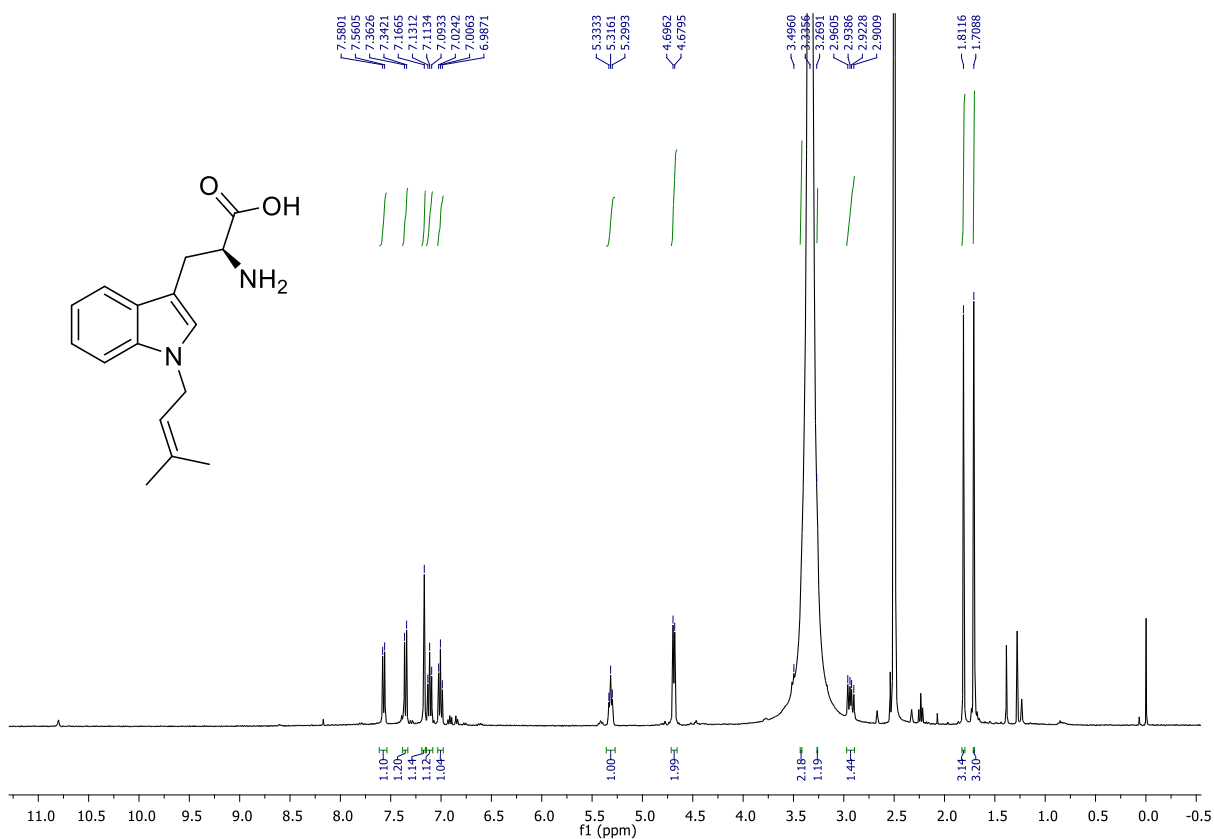

<sup>1</sup>H NMR spectrum (*d*<sub>6</sub>-DMSO, 400 MHz) of 1-(3-methylbut-2-en-1-yl)-L-tryptophan **3d**.

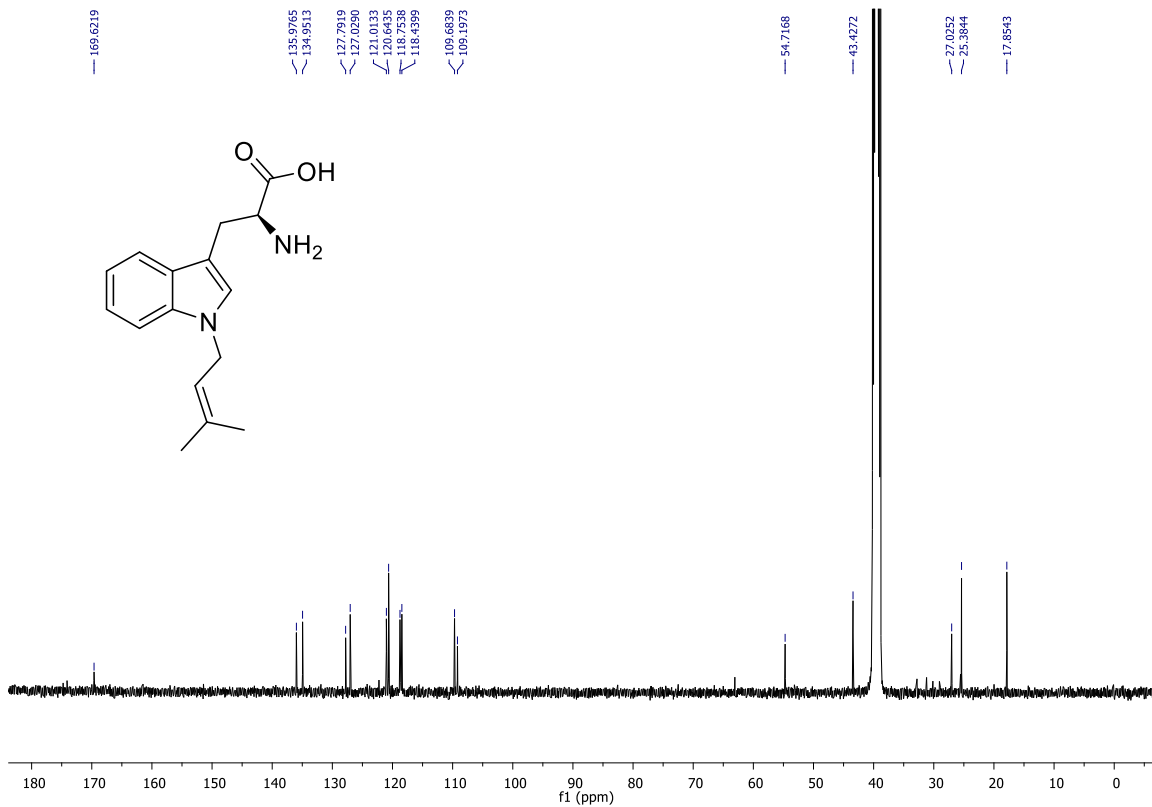

<sup>13</sup>C NMR spectrum (*d*<sub>6</sub>-DMSO, 100 MHz) of 1-(3-methylbut-2-en-1-yl)-L-tryptophan **3d**.

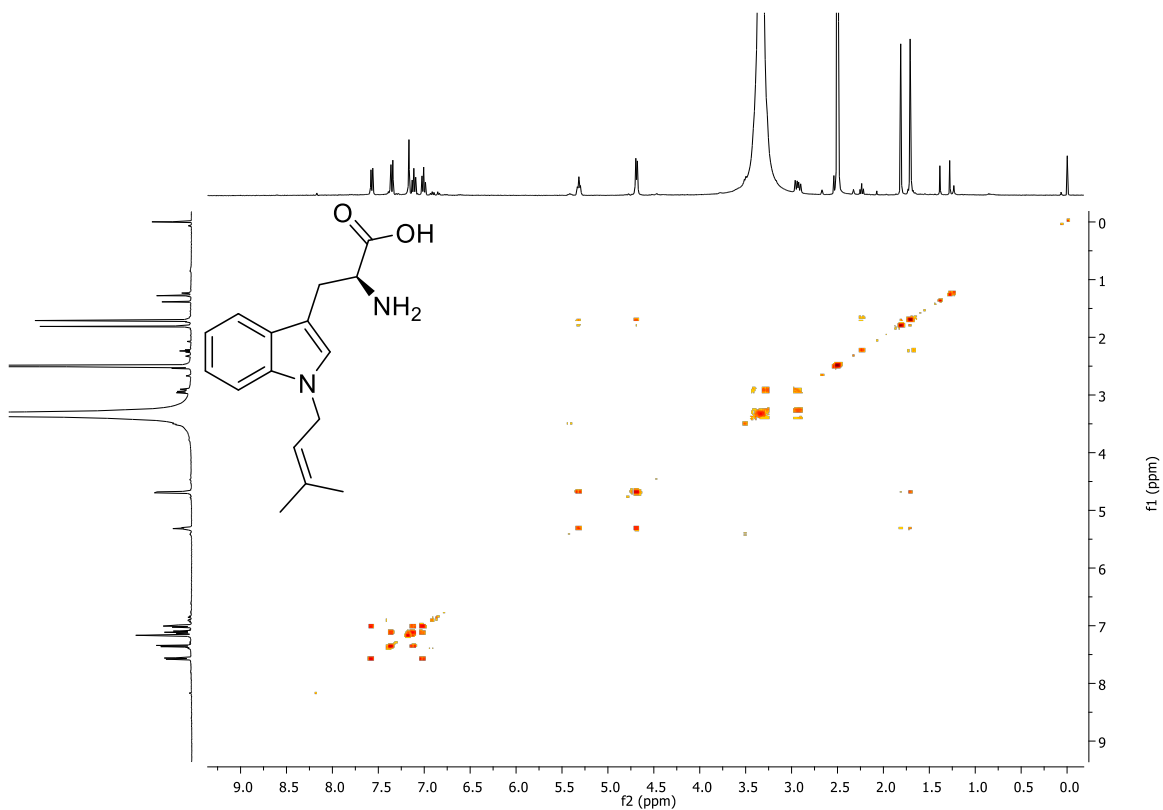

$^1\text{H}$ - $^1\text{H}$  COSY NMR spectrum ( $d_6$ -DMSO, 400 MHz) of 1-(3-methylbut-2-en-1-yl)-L-tryptophan **3d**.

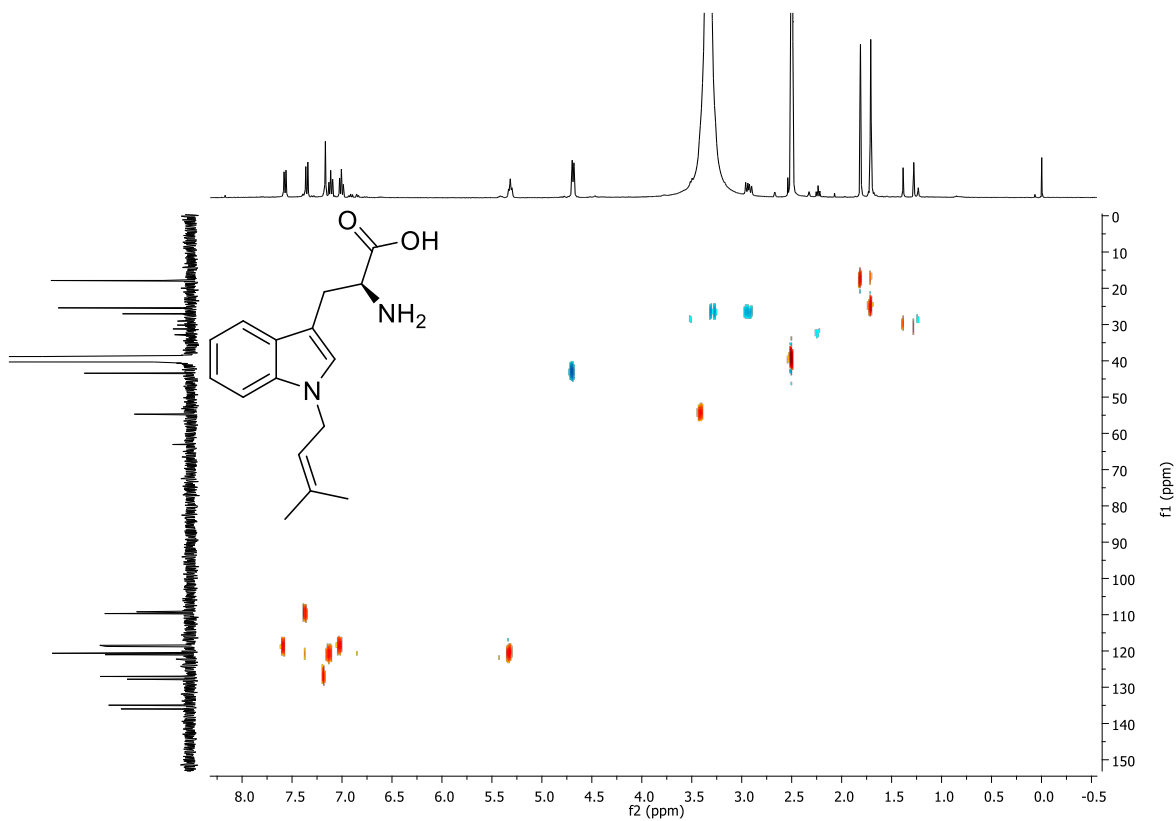

$^1\text{H}$ - $^{13}\text{C}$  HSQC spectrum (DMSO- $d_6$ , 400 MHz) of 1-(3-methylbut-2-en-1-yl)-L-tryptophan **3d**.

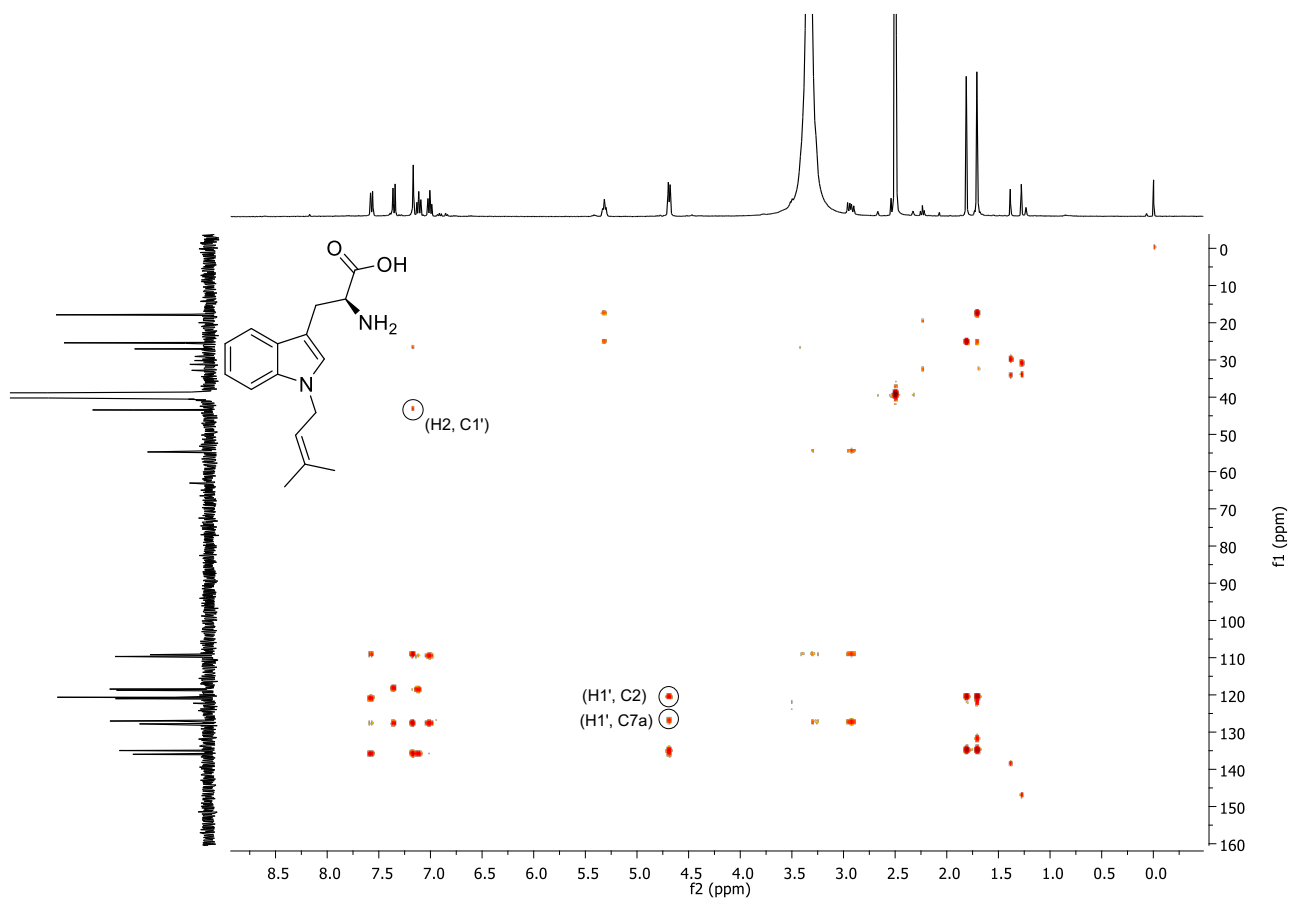

$^1\text{H}$ - $^{13}\text{C}$  HMBC NMR spectrum ( $d_6$ -DMSO, 400 MHz) of 1-(3-methylbut-2-en-1-yl)-L-tryptophan **3d**. Significant correlations are highlighted.
